# Supplementary material for: Mechanistic insights into CeO2-catalyzed direct synthesis of diethyl carbonate from CO2 and ethanol assisted by zeolite and 2,2-diethoxypropane
Source: Royal Society of Chemistry journal article supplement (doi:10.1039/d3cy00661a), 2023-01-01
Supplement: d3cy00661a1.pdf [file d3cy00661a1.pdf]

## Electronic Supplementary Information

# Mechanistic insights into CeO<sub>2</sub>-catalyzed direct synthesis of diethyl carbonate from CO<sub>2</sub> and ethanol assisted by zeolite and 2,2-deoxypropane

Tao Chang,<sup>a</sup> Mizuho Yabushita,<sup>a</sup> Yoshinao Nakagawa,<sup>a</sup> Norihisa Fukaya,<sup>b</sup> Jun-Chul Choi,<sup>b</sup>  
Takayoshi Mishima,<sup>c</sup> Seiji Matsumoto,<sup>c</sup> Satoshi Hamura,<sup>c</sup> Keiichi Tomishige<sup>\*,a,d</sup>

<sup>a</sup>Department of Applied Chemistry, School of Engineering, Tohoku University, 6-6-07 Aoba, Aramaki, Aoba-ku, Sendai, Miyagi 980-8579, Japan

<sup>b</sup>National Institute of Advanced Industrial Science and Technology, Tsukuba Central 5, 1-1-1 Higashi, Tsukuba, Ibaraki 305-8565, Japan

<sup>c</sup>Tosoh Corporation, 3-8-2 Shiba, Minato-ku, Tokyo 105-8623, Japan

<sup>d</sup>Advanced Institute for Materials Research (WPI-AIMR), Tohoku University, 2-1-1 Katahira, Aoba-ku, Sendai, Miyagi 980-8577, Japan

\*Corresponding author: [tomishige@tohoku.ac.jp](mailto:tomishige@tohoku.ac.jp)

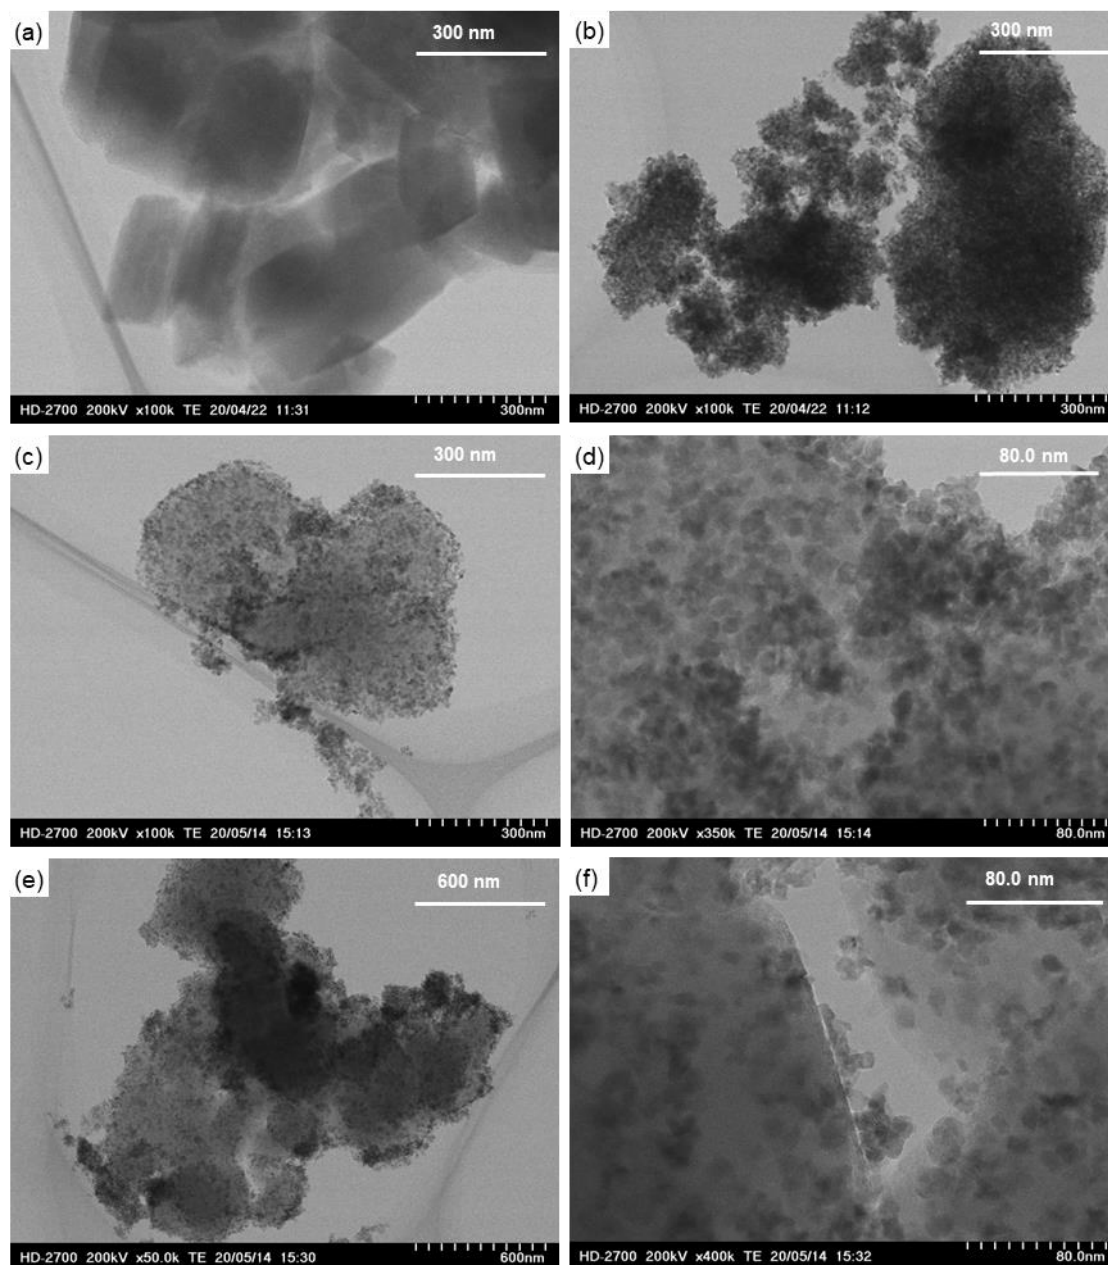

**Fig. S1.** TEM images of (a) H-FAU, (b) CeO<sub>2</sub>, (c) mixture of CeO<sub>2</sub> and H-FAU after the reaction, (d) expanded image of the figure (c), (e) mixture of CeO<sub>2</sub> and H-FAU after reaction (another view), and (f) expanded image of the figure (e).

Reaction conditions: CeO<sub>2</sub> 0.5 g; H-FAU 0.01 g; EtOH 140 mmol; DEP 21 mmol; CO<sub>2</sub> 6.5 MPa (at 393 K); 393 K; 1 h.

Reprinted from ref. S1 with permission from Royal Society of Chemistry, copyright 2020.

**Table S1.** Estimation of apparent activation energy for the DEC synthesis over CeO<sub>2</sub> in the presence of DEP and H-FAU (detailed data for Table 1 and Fig. S2).<sup>a</sup>

| Entry | Temp. /K | Time /min | Reactant used /mmol |      | Product /mmol |         | DEP conv. /% | Balance /%                 |     | $r_{\text{DEC}}^{\text{c}}$ /mmol h <sup>-1</sup> | $\ln(r_{\text{DEC}} / \text{mmol h}^{-1})$ |
|-------|----------|-----------|---------------------|------|---------------|---------|--------------|----------------------------|-----|---------------------------------------------------|--------------------------------------------|
|       |          |           | DEP                 | EtOH | DEC           | Acetone |              | Ethoxy moiety <sup>b</sup> | DEP |                                                   |                                            |
| 1     | 363      | 3         | 21                  | 140  | 0.015         | 0.58    | 4.7          | 93                         | 96  | 0.19                                              | -1.7                                       |
| 2     | 363      | 10        | 21                  | 139  | 0.045         | 0.64    | 4.7          | 95                         | 97  |                                                   |                                            |
| 3     | 363      | 20        | 21                  | 139  | 0.070         | 0.63    | 5.1          | 97                         | 99  |                                                   |                                            |
| 4     | 373      | 3         | 21                  | 140  | 0.033         | 0.46    | 5.0          | 104                        | 105 | 0.55                                              | -0.59                                      |
| 5     | 373      | 10        | 21                  | 139  | 0.10          | 0.54    | 4.8          | 106                        | 107 |                                                   |                                            |
| 6     | 373      | 20        | 21                  | 139  | 0.19          | 0.82    | 6.5          | 106                        | 108 |                                                   |                                            |
| 7     | 383      | 3         | 21                  | 140  | 0.049         | 0.51    | 6.8          | 104                        | 103 | 0.72                                              | -0.33                                      |
| 8     | 383      | 10        | 21                  | 140  | 0.11          | 0.58    | 6.1          | 101                        | 101 |                                                   |                                            |
| 9     | 383      | 20        | 21                  | 140  | 0.25          | 0.79    | 7.0          | 103                        | 103 |                                                   |                                            |
| 10    | 393      | 3         | 21                  | 140  | 0.096         | 0.84    | 8.7          | 98                         | 97  | 1.3                                               | 0.27                                       |
| 11    | 393      | 10        | 21                  | 140  | 0.28          | 1.1     | 9.7          | 102                        | 101 |                                                   |                                            |
| 12    | 393      | 20        | 21                  | 140  | 0.47          | 1.3     | 10           | 100                        | 100 |                                                   |                                            |

<sup>a</sup>Reaction conditions: CeO<sub>2</sub> 0.030 g; H-FAU 0.010 g; EtOH 140 mmol; DEP 21 mmol; CO<sub>2</sub> 5 MPa (at each reaction temperature); 3–20 min.

<sup>b</sup>Balance of ethoxy moiety involved in DEC, DEP, and EtOH. <sup>c</sup>Formation rate of DEC, estimated from each slope in Fig. S2.

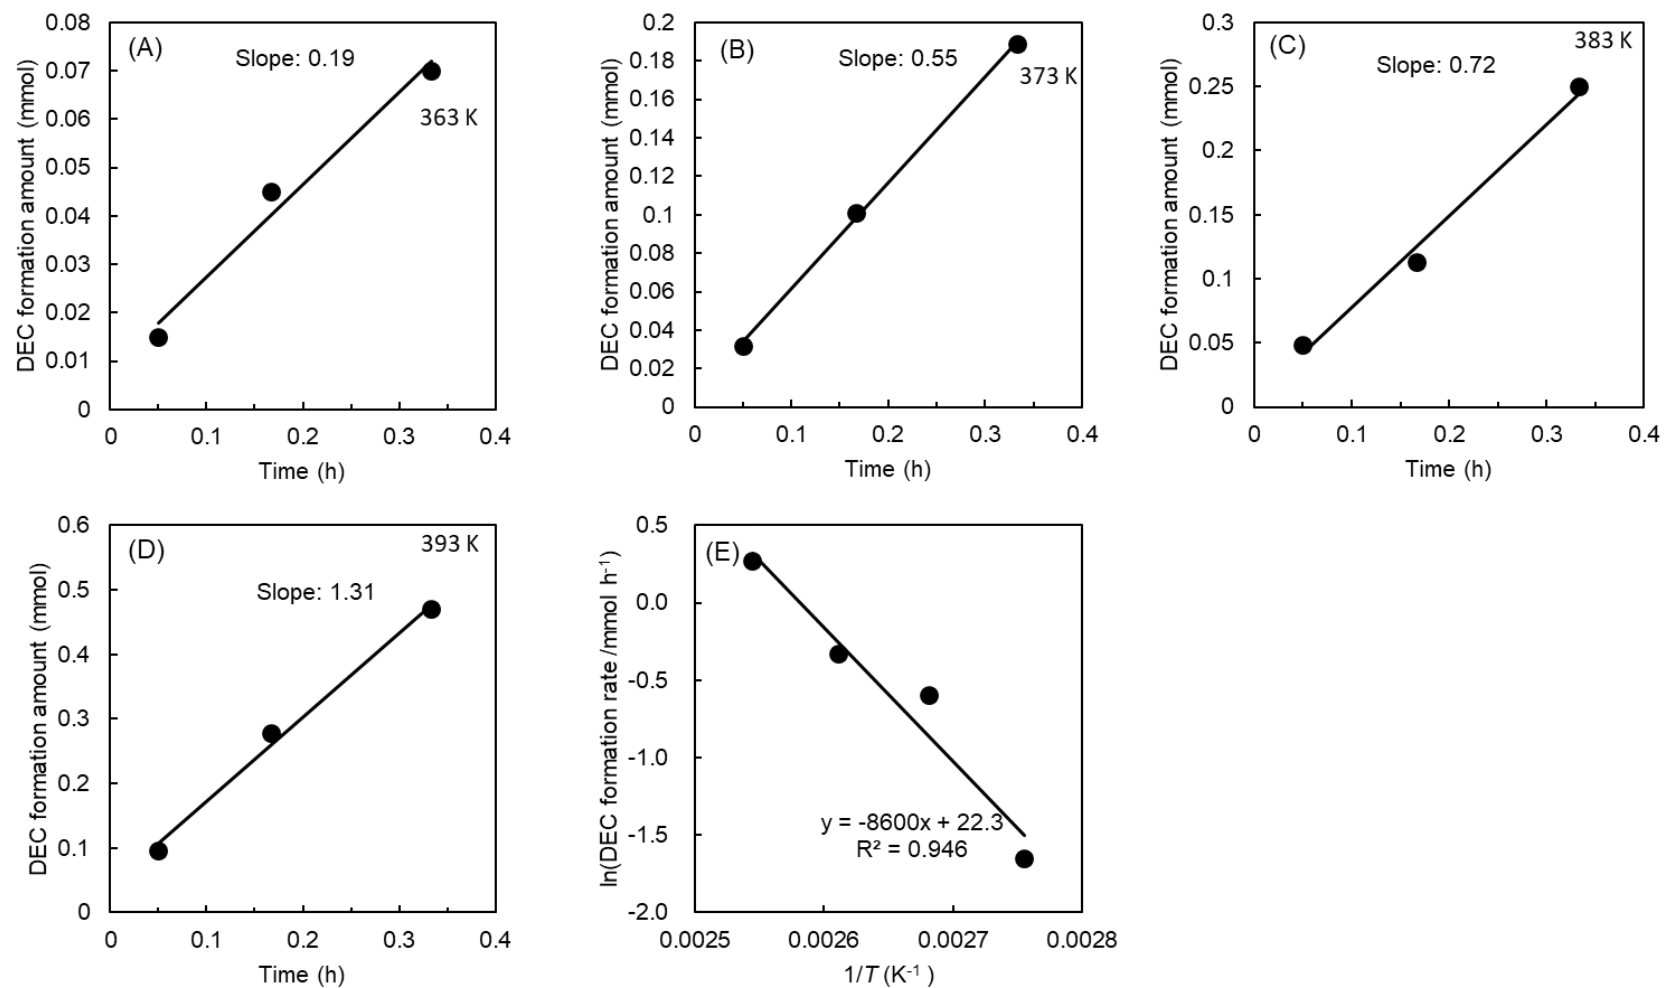

**Fig. S2.** Time courses for the DEC formation over CeO<sub>2</sub> in the presence of DEP and H-FAU at (A) 363 K, (B) 373 K, (C) 383 K, and (D) 393 K. (E) Arrhenius plot based on the initial reaction rates at the different temperatures determined from the figures A–D. The detailed data are summarized in Table S1. Reaction conditions: CeO<sub>2</sub> 0.03 g; H-FAU 0.01 g; EtOH 140 mmol; DEP 21 mmol; CO<sub>2</sub> 5 MPa (at each reaction temperature); 3–20 min.

**Table S2.** Estimation of apparent activation energy for the DEC synthesis over CeO<sub>2</sub> (detailed data for Table 1 and Fig. S3).<sup>a</sup>

| Entry | Temp. /K | Time /min | Reactant used /mmol |  | Product /mmol |  | Balance /%<br>Ethoxy moiety <sup>b</sup> | $r_{\text{DEC}}^{\text{c}}$<br>/mmol h <sup>-1</sup> | $\ln(r_{\text{DEC}} / \text{mmol h}^{-1})$ |
|-------|----------|-----------|---------------------|--|---------------|--|------------------------------------------|------------------------------------------------------|--------------------------------------------|
|       |          |           | EtOH                |  | DEC           |  |                                          |                                                      |                                            |
| 1     | 373      | 3         | 140                 |  | 0.0010        |  | 94                                       | 0.012                                                | -4.4                                       |
| 2     | 373      | 10        | 139                 |  | 0.0018        |  | 91                                       |                                                      |                                            |
| 3     | 373      | 21        | 139                 |  | 0.0042        |  | 93                                       |                                                      |                                            |
| 4     | 383      | 3         | 140                 |  | 0.0044        |  | 100                                      | 0.024                                                | -3.7                                       |
| 5     | 383      | 10        | 140                 |  | 0.0080        |  | 100                                      |                                                      |                                            |
| 6     | 383      | 20        | 140                 |  | 0.011         |  | 98                                       |                                                      |                                            |
| 7     | 393      | 3         | 140                 |  | 0.0057        |  | 94                                       | 0.075                                                | -2.6                                       |
| 8     | 393      | 13        | 140                 |  | 0.018         |  | 94                                       |                                                      |                                            |
| 9     | 393      | 23        | 140                 |  | 0.031         |  | 94                                       |                                                      |                                            |
| 10    | 403      | 0         | 140                 |  | 0.017         |  | 94                                       | 0.16                                                 | -1.8                                       |
| 11    | 403      | 10        | 140                 |  | 0.039         |  | 95                                       |                                                      |                                            |
| 12    | 403      | 20        | 140                 |  | 0.062         |  | 95                                       |                                                      |                                            |

<sup>a</sup>Reaction conditions: CeO<sub>2</sub> 0.03 g; EtOH 140 mmol; CO<sub>2</sub> 5 MPa (at each reaction temperature); 3–23 min. <sup>b</sup>Balance of ethoxy moiety involved in DEC and EtOH. <sup>c</sup>Formation rate of DEC, estimated from each slope in Fig. S3.

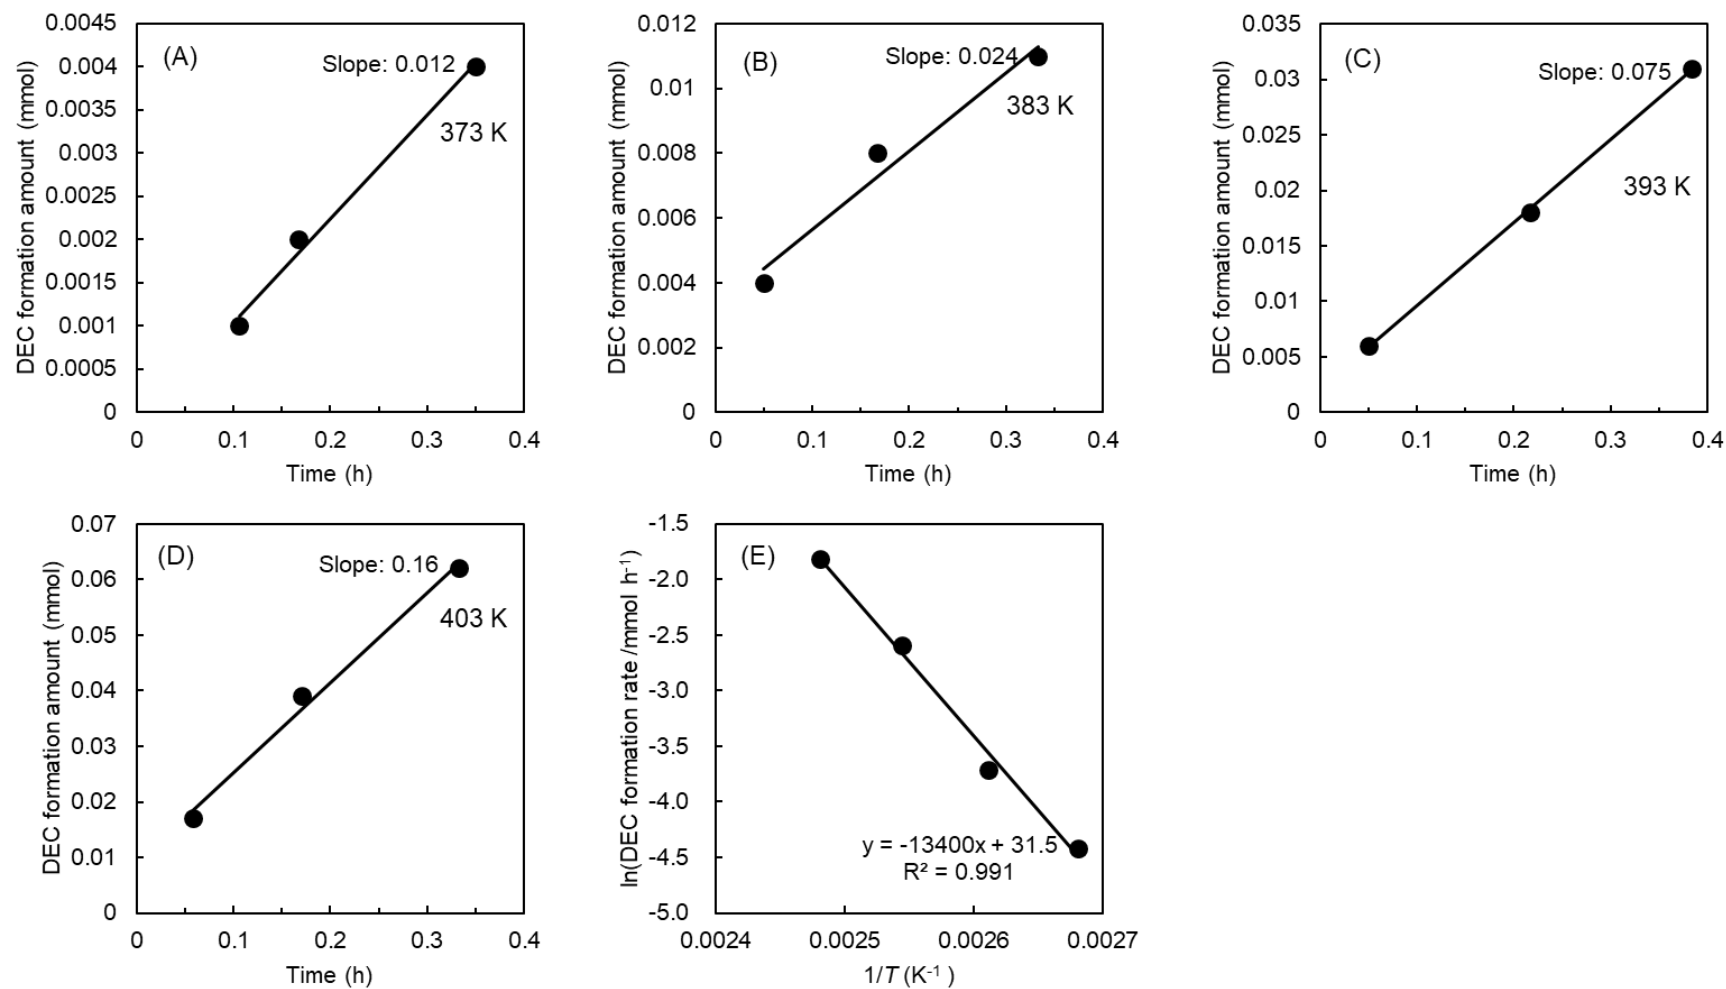

**Fig. S3.** Time courses for the DEC formation over CeO<sub>2</sub> at (A) 363 K, (B) 373 K, (C) 383 K, and (D) 393 K. (E) Arrhenius plot based on the initial reaction rates at the different temperatures determined from the figures A–D. The detailed data are summarized in Table S2. Reaction conditions: CeO<sub>2</sub> 0.03 g; EtOH 140 mmol; CO<sub>2</sub> 5 MPa (at each reaction temperature); 3–23 min.

**Table S3.** Estimation of apparent activation energy for the DEC synthesis over CeO<sub>2</sub> in the presence of DEP (detailed data for Table 1 and Fig. S4).<sup>a</sup>

| Entry | Temp. /K | Time /min | Reactant used /mmol |      | Product /mmol |         | DEP conv. /% | Balance /%                 |     | $r_{\text{DEC}}^{\text{c}}$ /mmol h <sup>-1</sup> | $\ln(r_{\text{DEC}} / \text{mmol h}^{-1})$ |
|-------|----------|-----------|---------------------|------|---------------|---------|--------------|----------------------------|-----|---------------------------------------------------|--------------------------------------------|
|       |          |           | DEP                 | EtOH | DEC           | Acetone |              | Ethoxy moiety <sup>b</sup> | DEP |                                                   |                                            |
| 1     | 373      | 3         | 21                  | 140  | 0.0020        | 0.056   | 1.9          | 93                         | 96  | 0.025                                             | -3.7                                       |
| 2     | 373      | 10        | 21                  | 139  | 0.0047        | 0.11    | 2.4          | 93                         | 96  |                                                   |                                            |
| 3     | 373      | 20        | 21                  | 139  | 0.0095        | 0.16    | 3.0          | 97                         | 100 |                                                   |                                            |
| 4     | 383      | 3         | 21                  | 140  | 0.0035        | 0.071   | 2.2          | 94                         | 96  | 0.064                                             | -2.8                                       |
| 5     | 383      | 10        | 21                  | 140  | 0.0087        | 0.13    | 3.0          | 95                         | 98  |                                                   |                                            |
| 6     | 383      | 20        | 21                  | 140  | 0.021         | 0.20    | 3.9          | 95                         | 97  |                                                   |                                            |
| 7     | 393      | 3         | 21                  | 140  | 0.0066        | 0.084   | 2.5          | 93                         | 94  | 0.13                                              | -2.0                                       |
| 8     | 393      | 10        | 21                  | 140  | 0.021         | 0.16    | 3.9          | 95                         | 96  |                                                   |                                            |
| 9     | 393      | 20        | 21                  | 140  | 0.044         | 0.23    | 5.1          | 94                         | 96  |                                                   |                                            |
| 10    | 403      | 3         | 21                  | 140  | 0.016         | 0.094   | 3.0          | 92                         | 95  | 0.25                                              | -1.4                                       |
| 11    | 403      | 10        | 21                  | 139  | 0.049         | 0.18    | 4.9          | 94                         | 95  |                                                   |                                            |
| 12    | 403      | 20        | 21                  | 139  | 0.086         | 0.26    | 6.3          | 94                         | 95  |                                                   |                                            |

<sup>a</sup>Reaction conditions: CeO<sub>2</sub> 0.03 g; EtOH 140 mmol; DEP 21 mmol; CO<sub>2</sub> 5 MPa (at each reaction temperature); 3–20 min. <sup>b</sup>Balance of ethoxy moiety involved in DEC, DEP, and EtOH. <sup>c</sup>Formation rate of DEC, estimated from each slope in Fig. S4.

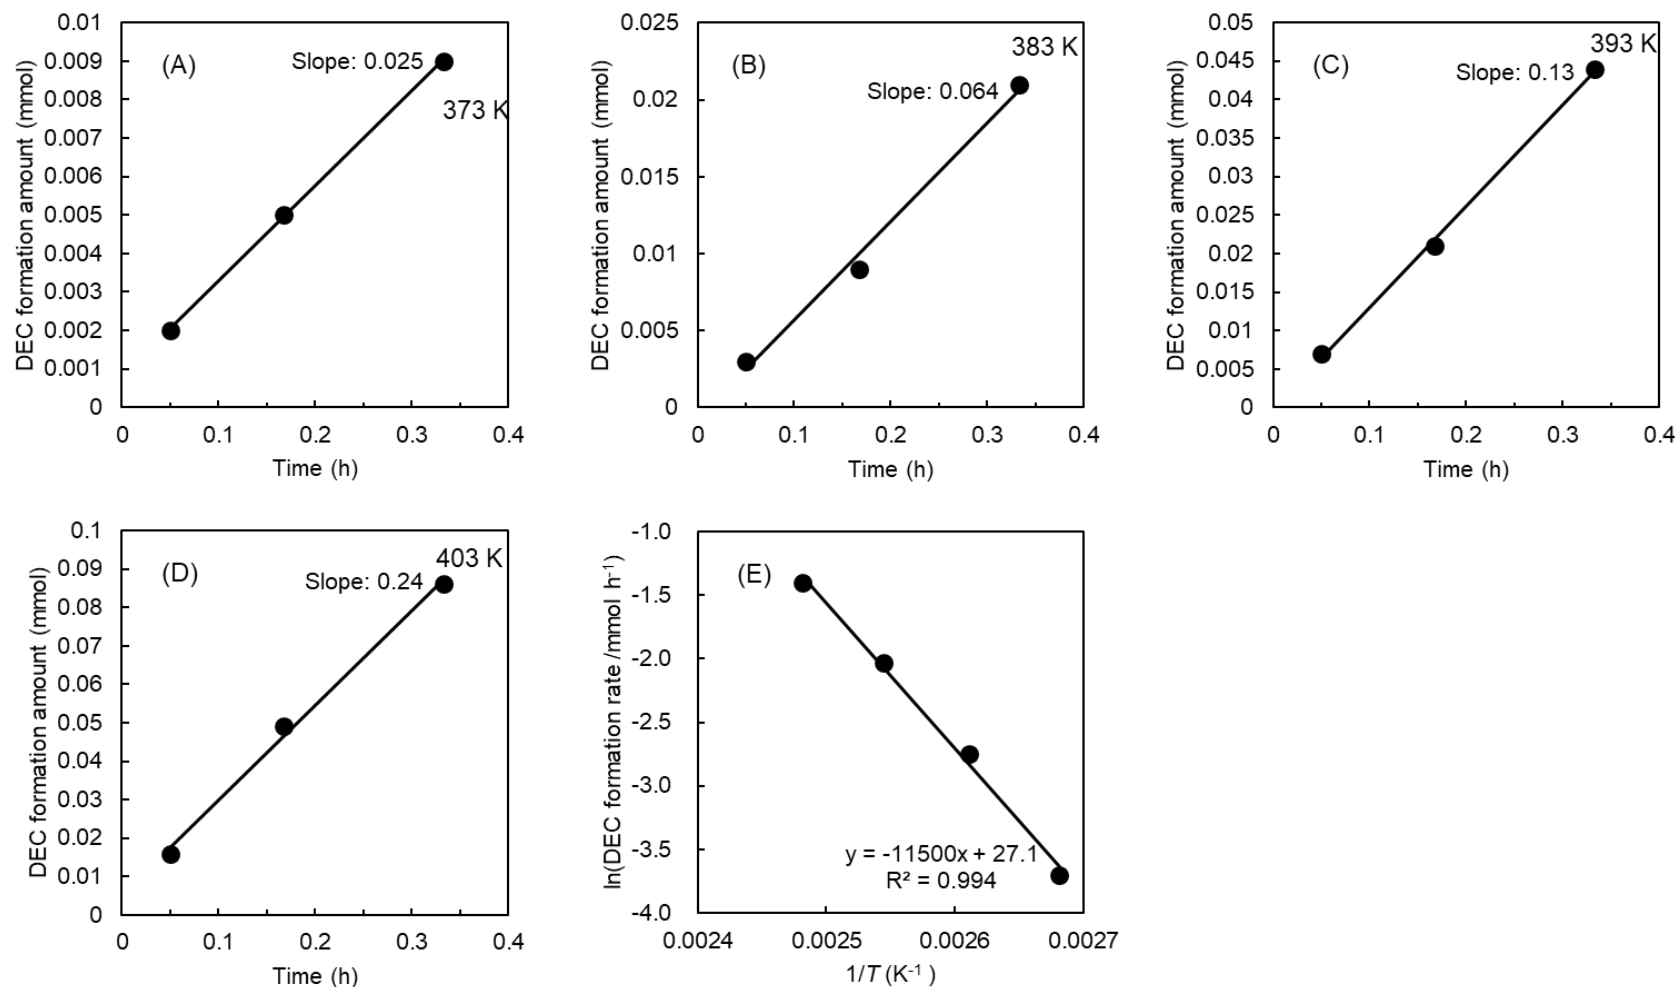

**Fig. S4.** Time courses for the DEC formation over CeO<sub>2</sub> in the presence of DEP at (A) 373 K, (B) 383 K, (C) 393 K, and (D) 403 K. (E) Arrhenius plot based on the initial reaction rates at the different temperatures determined from the figures A–D. The detailed data are summarized in Table S3.

Reaction conditions: CeO<sub>2</sub> 0.03 g; EtOH 140 mmol; DEP 21 mmol; CO<sub>2</sub> 5 MPa (at each reaction temperature); 3–20 min.



**Table S4.** Estimation of apparent activation energy for the DEC synthesis over CeO<sub>2</sub> in the presence of H-FAU (detailed data for Table 1 and Fig. S5).<sup>a</sup>

| Entry | Temp. /K | Time /min | Reactant used /mmol |        | Product /mmol |       | Balance /%<br>Ethoxy moiety <sup>b</sup> | $r_{\text{DEC}}^{\text{c}}$<br>/mmol h <sup>-1</sup> | ln( $r_{\text{DEC}}$ /mmol h <sup>-1</sup> ) |
|-------|----------|-----------|---------------------|--------|---------------|-------|------------------------------------------|------------------------------------------------------|----------------------------------------------|
|       |          |           | EtOH                | DEC    | DEC           | DEC   |                                          |                                                      |                                              |
| 1     | 373      | 3         | 140                 | 0.0016 | 91            | 0.012 | -4.4                                     |                                                      |                                              |
| 2     | 373      | 13        | 140                 | 0.0036 | 92            |       |                                          |                                                      |                                              |
| 3     | 373      | 23        | 140                 | 0.0056 | 91            |       |                                          |                                                      |                                              |
| 4     | 383      | 3         | 140                 | 0.0034 | 91            | 0.030 | -3.5                                     |                                                      |                                              |
| 5     | 383      | 10        | 139                 | 0.0076 | 92            |       |                                          |                                                      |                                              |
| 6     | 383      | 23        | 139                 | 0.013  | 92            |       |                                          |                                                      |                                              |
| 7     | 393      | 3         | 140                 | 0.0042 | 92            | 0.078 | -2.6                                     |                                                      |                                              |
| 8     | 393      | 13        | 140                 | 0.017  | 93            |       |                                          |                                                      |                                              |
| 9     | 393      | 23        | 140                 | 0.030  | 94            |       |                                          |                                                      |                                              |

<sup>a</sup>Reaction conditions: CeO<sub>2</sub> 0.03 g; H-FAU 0.01 g; EtOH 140 mmol; CO<sub>2</sub> 5 MPa (at each reaction temperature); 3–23 min.

<sup>b</sup>Balance of ethoxy moiety involved in DEC and EtOH. <sup>c</sup>Formation rate of DEC, estimated from each slope in Fig. S5.

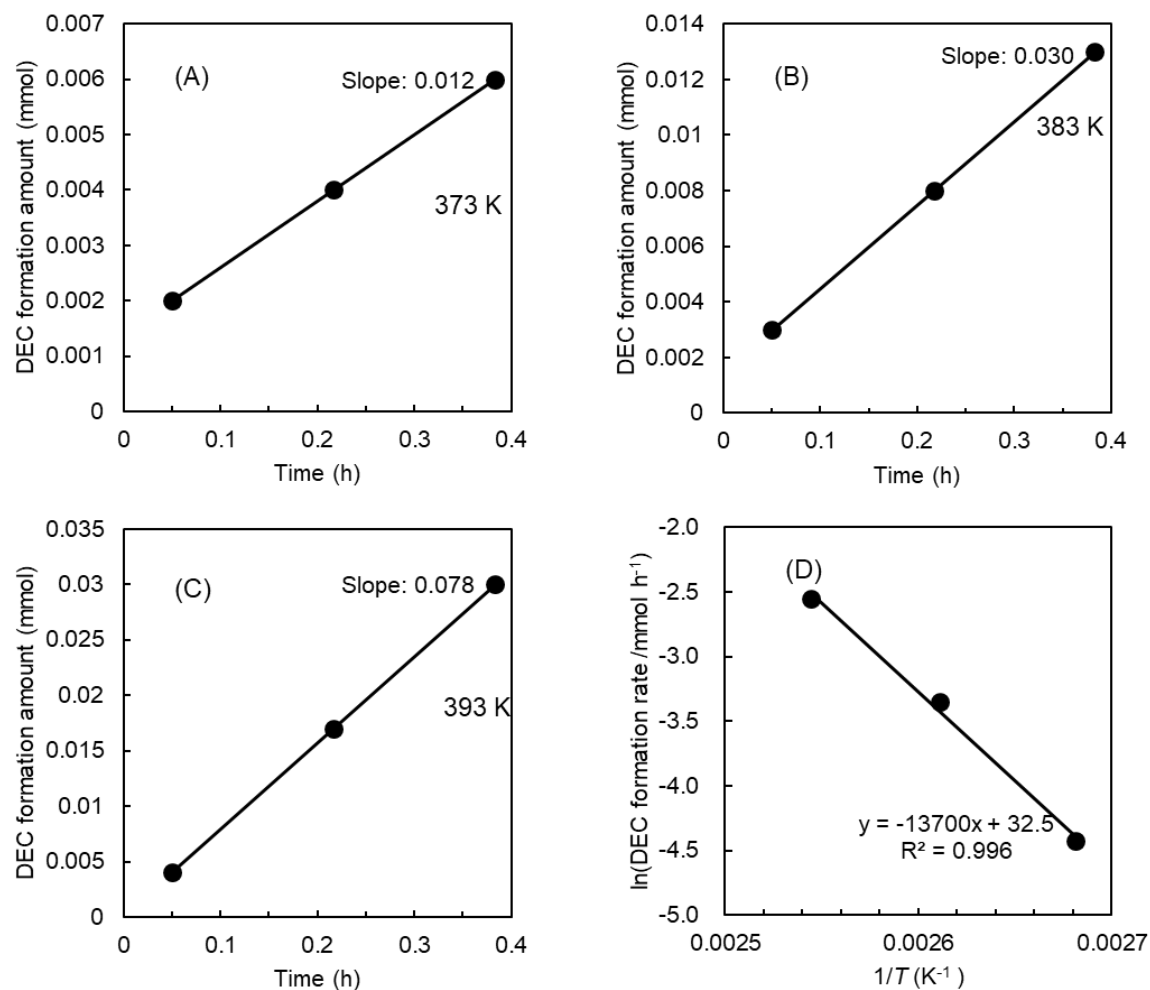

**Fig. S5.** Time courses for the DEC formation over CeO<sub>2</sub> in the presence of H-FAU at (A) 373 K, (B) 383 K, and (C) 393 K. (D) Arrhenius plot based on the initial reaction rates at the different temperatures determined from the figures A–C. The detailed data are summarized in Table S4. Reaction conditions: CeO<sub>2</sub> 0.03 g; H-FAU 0.01 g; EtOH 140 mmol; CO<sub>2</sub> 5 MPa (at each reaction temperature); 3–23 min.

**Table S5.** Effect of CeO<sub>2</sub> amount on the DEC synthesis over CeO<sub>2</sub> in the presence of DEP and H-FAU (detailed data for Figs. 2A and S6).<sup>a</sup>

| Entry | CeO <sub>2</sub> /g | Time /min | Product /mmol |         | DEC yield /% | Balance /%                                 |     | $r_{\text{DEC}}^{\text{c}}$ /mmol h <sup>-1</sup> | $\log_{10}(r_{\text{DEC}}^{\text{c}})$ /mmol h <sup>-1</sup> |
|-------|---------------------|-----------|---------------|---------|--------------|--------------------------------------------|-----|---------------------------------------------------|--------------------------------------------------------------|
|       |                     |           | DEC           | Acetone |              | Ethoxy moiety <sup>b</sup> (in DEP + EtOH) | DEP |                                                   |                                                              |
| 1     | 0.03                | 3         | 0.13          | 0.68    | 0.60         | 101                                        | 106 | 1.1                                               | 0.058                                                        |
| 2     | 0.03                | 10        | 0.23          | 0.88    | 1.1          | 101                                        | 105 |                                                   |                                                              |
| 3     | 0.03                | 20        | 0.45          | 1.2     | 2.2          | 97                                         | 101 |                                                   |                                                              |
| 4     | 0.06                | 3         | 0.20          | 0.82    | 0.95         | 99                                         | 105 | 2.4                                               | 0.38                                                         |
| 5     | 0.06                | 7         | 0.32          | 1.0     | 1.5          | 99                                         | 103 |                                                   |                                                              |
| 6     | 0.06                | 15        | 0.67          | 1.5     | 3.2          | 98                                         | 102 |                                                   |                                                              |
| 7     | 0.09                | 3         | 0.24          | 1.0     | 1.2          | 96                                         | 105 | 3.2                                               | 0.51                                                         |
| 8     | 0.09                | 7         | 0.45          | 1.3     | 2.1          | 101                                        | 106 |                                                   |                                                              |
| 9     | 0.09                | 15        | 0.88          | 1.9     | 4.2          | 101                                        | 103 |                                                   |                                                              |
| 10    | 0.15                | 3         | 0.35          | 1.2     | 1.7          | 100                                        | 106 | 4.2                                               | 0.62                                                         |
| 11    | 0.15                | 7         | 0.56          | 1.5     | 2.7          | 98                                         | 103 |                                                   |                                                              |
| 12    | 0.15                | 15        | 1.2           | 2.1     | 5.6          | 93                                         | 100 |                                                   |                                                              |
| 13    | 0.20                | 3         | 0.40          | 1.4     | 1.9          | 101                                        | 108 | 5.1                                               | 0.70                                                         |
| 14    | 0.20                | 7         | 0.74          | 1.8     | 3.6          | 101                                        | 106 |                                                   |                                                              |
| 15    | 0.20                | 15        | 1.4           | 2.6     | 6.7          | 100                                        | 103 |                                                   |                                                              |
| 16    | 0.25                | 3         | 0.33          | 1.4     | 1.6          | 98                                         | 104 | 6.4                                               | 0.81                                                         |
| 17    | 0.25                | 7         | 0.82          | 2.0     | 3.9          | 101                                        | 106 |                                                   |                                                              |
| 18    | 0.25                | 15        | 1.6           | 2.9     | 7.8          | 101                                        | 105 |                                                   |                                                              |
| 19    | 0.35                | 3         | 0.54          | 1.8     | 2.6          | 102                                        | 109 | 7.0                                               | 0.85                                                         |
| 20    | 0.35                | 7         | 0.96          | 2.2     | 4.6          | 99                                         | 103 |                                                   |                                                              |
| 21    | 0.35                | 15        | 1.9           | 3.3     | 9.1          | 100                                        | 103 |                                                   |                                                              |
| 22    | 0.70                | 3         | 0.71          | 2.8     | 3.4          | 99                                         | 108 | 8.7                                               | 0.94                                                         |
| 23    | 0.70                | 7         | 1.2           | 3.4     | 5.9          | 100                                        | 106 |                                                   |                                                              |
| 24    | 0.70                | 15        | 2.4           | 4.6     | 12           | 99                                         | 103 |                                                   |                                                              |
| 25    | 1.5                 | 3         | 0.62          | 4.5     | 2.9          | 100                                        | 109 | 7.0                                               | 0.84                                                         |
| 26    | 1.5                 | 7         | 1.1           | 5.2     | 5.3          | 100                                        | 107 |                                                   |                                                              |
| 27    | 1.5                 | 15        | 2.0           | 6.1     | 9.6          | 96                                         | 102 |                                                   |                                                              |

<sup>a</sup>Reaction conditions: CeO<sub>2</sub> 0.03–1.5 g; H-FAU 0.01 g; EtOH 6.5 g; DEP 2.8 g; toluene 20 g; CO<sub>2</sub> 5 MPa (at 393 K); 393 K; 3–20 min. <sup>b</sup>Balance of ethoxy moiety involved in DEC, DEP, and EtOH. <sup>c</sup>Formation rate of DEC, estimated from each slope in Fig. S6.

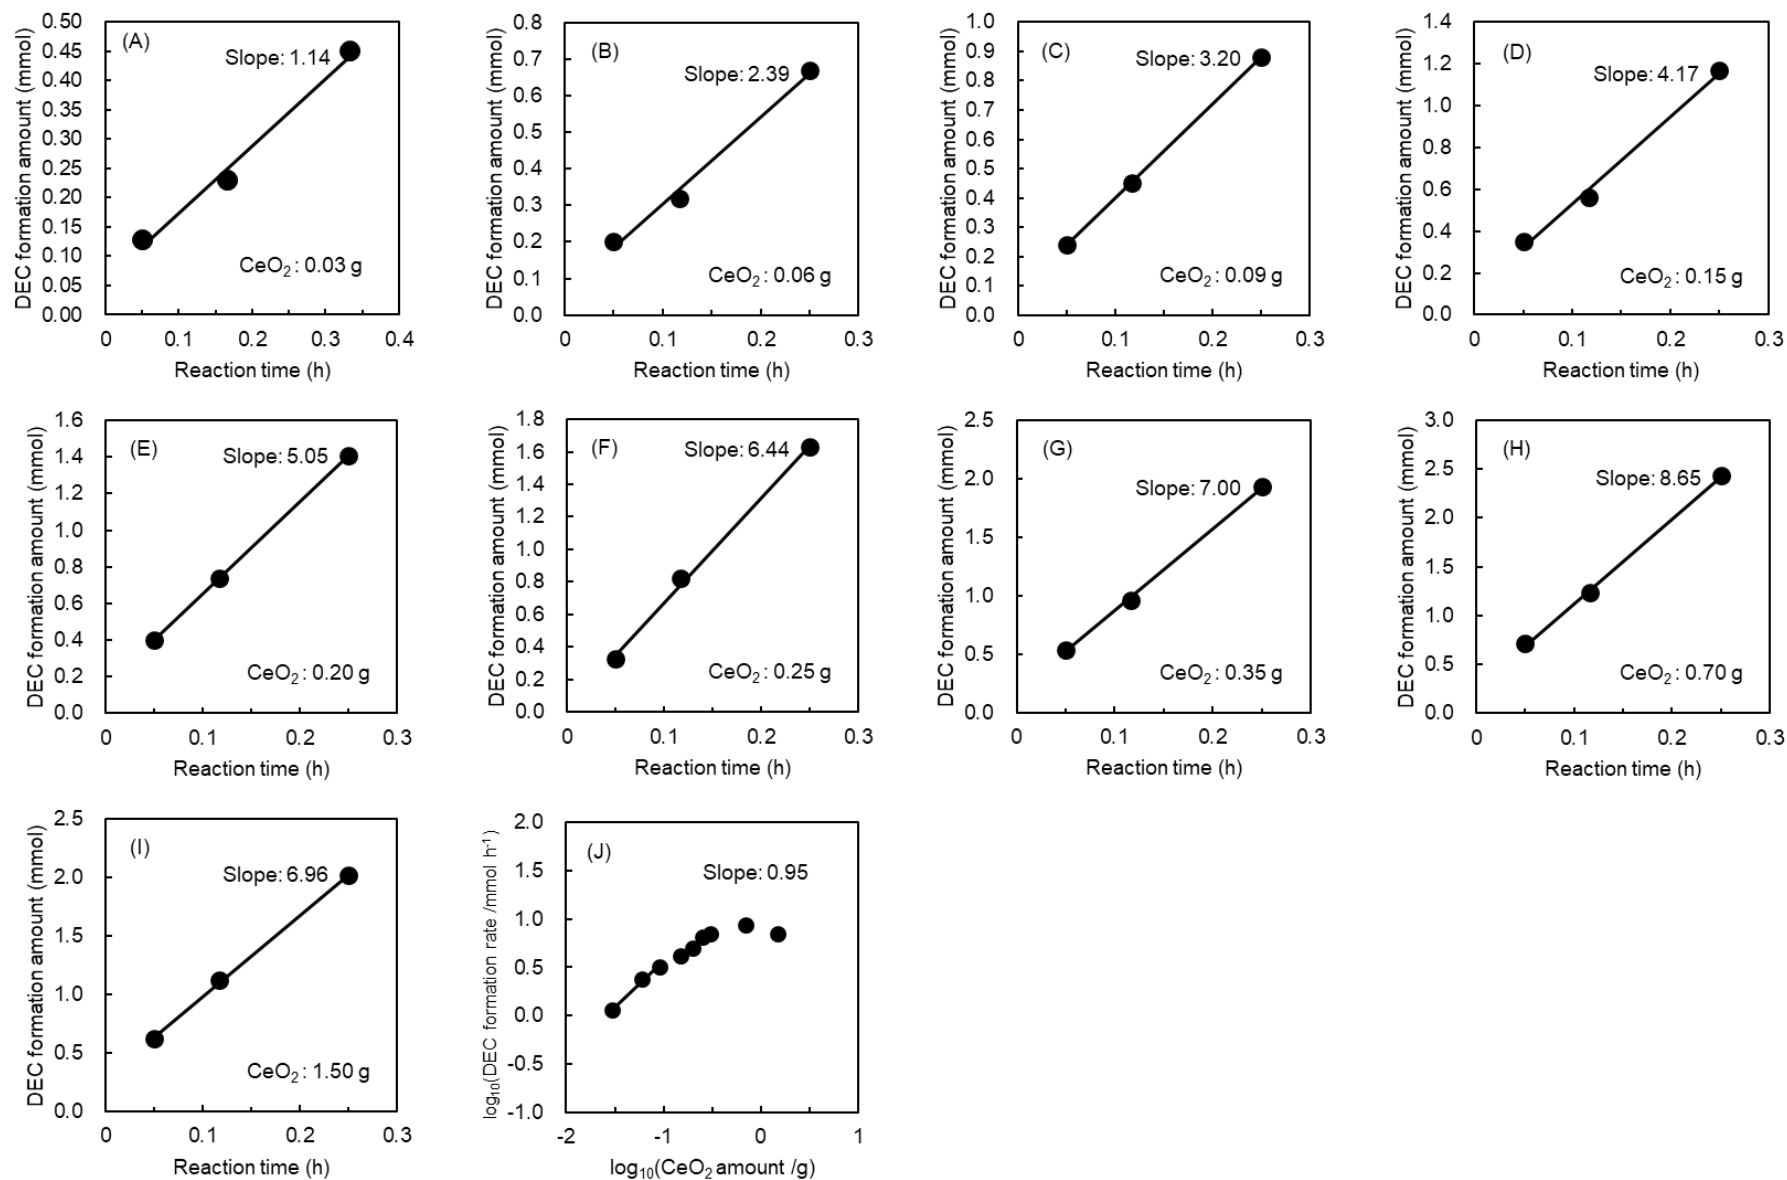

**Fig. S6.** Effect of CeO<sub>2</sub> amount on time courses for the DEC formation over CeO<sub>2</sub> in the presence of DEP and H-FAU. CeO<sub>2</sub> amount = (A) 0.03 g; (B) 0.06 g; (C) 0.09 g; (D) 0.15 g; (E) 0.20 g; (F) 0.25 g; (G) 0.35 g; (H) 0.70 g; (I) 1.5 g. (J) Double logarithmic plot of DEC formation rate as a function of CeO<sub>2</sub> amount at constant H-FAU loading (same figure as Fig. 2A). The detailed data are summarized in Table S5.

Reaction conditions: CeO<sub>2</sub> 0.03–1.5 g; H-FAU 0.01 g; EtOH 6.5 g; DEP 2.8 g; toluene 20 g; CO<sub>2</sub> 5 MPa (at 393 K); 393 K; 3–20 min.

**Table S6.** Effect of H-FAU amount on the DEC synthesis over CeO<sub>2</sub> in the presence of DEP and H-FAU (detailed data for Figs. 2B and S7).<sup>a</sup>

| Entry | H-FAU /g | Time /min | Product /mmol |         | DEC yield /% | Balance /%                 |     | $r_{\text{DEC}}^{\text{c}}$ /mmol h <sup>-1</sup> | $\log_{10}(r_{\text{DEC}})$ /mmol h <sup>-1</sup> |
|-------|----------|-----------|---------------|---------|--------------|----------------------------|-----|---------------------------------------------------|---------------------------------------------------|
|       |          |           | DEC           | Acetone |              | Ethoxy moiety <sup>b</sup> | DEP |                                                   |                                                   |
| 1     | 0.00     | 3         | 0.020         | 0.12    | >0.1         | 92                         | 98  | 0.36                                              | -0.44                                             |
| 2     | 0.00     | 10        | 0.068         | 0.30    | 0.32         | 96                         | 97  |                                                   |                                                   |
| 3     | 0.00     | 20        | 0.12          | 0.41    | 0.57         | 95                         | 98  |                                                   |                                                   |
| 4     | 0.01     | 3         | 0.24          | 1.0     | 1.2          | 96                         | 105 | 3.2                                               | 0.51                                              |
| 5     | 0.01     | 7         | 0.45          | 1.3     | 2.1          | 101                        | 106 |                                                   |                                                   |
| 6     | 0.01     | 15        | 0.88          | 1.9     | 4.2          | 101                        | 103 |                                                   |                                                   |
| 7     | 0.02     | 3         | 0.35          | 1.2     | 1.7          | 96                         | 103 | 5.1                                               | 0.71                                              |
| 8     | 0.02     | 7         | 0.66          | 1.6     | 3.2          | 100                        | 103 |                                                   |                                                   |
| 9     | 0.02     | 15        | 1.4           | 2.5     | 6.6          | 99                         | 100 |                                                   |                                                   |
| 10    | 0.03     | 3         | 0.43          | 1.6     | 2.0          | 100                        | 103 | 6.5                                               | 0.81                                              |
| 11    | 0.03     | 7         | 0.75          | 1.9     | 3.6          | 96                         | 99  |                                                   |                                                   |
| 12    | 0.03     | 15        | 1.7           | 3.3     | 8.1          | 100                        | 99  |                                                   |                                                   |
| 13    | 0.04     | 3         | 0.50          | 1.6     | 2.4          | 96                         | 98  | 7.3                                               | 0.86                                              |
| 14    | 0.04     | 7         | 0.83          | 1.9     | 4.0          | 94                         | 97  |                                                   |                                                   |
| 15    | 0.04     | 15        | 1.9           | 3.4     | 9.2          | 100                        | 102 |                                                   |                                                   |
| 16    | 0.07     | 3         | 1.1           | 2.1     | 5.0          | 104                        | 103 | 7.6                                               | 0.88                                              |
| 17    | 0.07     | 7         | 1.6           | 2.3     | 7.5          | 101                        | 100 |                                                   |                                                   |
| 18    | 0.07     | 15        | 2.7           | 3.3     | 13           | 100                        | 98  |                                                   |                                                   |
| 19    | 0.09     | 3         | 1.0           | 2.4     | 4.8          | 102                        | 97  | 7.8                                               | 0.89                                              |
| 20    | 0.09     | 7         | 1.5           | 2.6     | 7.1          | 104                        | 102 |                                                   |                                                   |
| 21    | 0.09     | 15        | 2.6           | 3.6     | 12           | 104                        | 100 |                                                   |                                                   |
| 22    | 0.12     | 3         | 0.96          | 2.5     | 4.6          | 101                        | 98  | 7.3                                               | 0.86                                              |
| 23    | 0.12     | 7         | 1.5           | 3.1     | 7.2          | 103                        | 97  |                                                   |                                                   |
| 24    | 0.12     | 15        | 2.4           | 3.8     | 12           | 109                        | 102 |                                                   |                                                   |

<sup>a</sup>Reaction conditions: CeO<sub>2</sub> 0.09 g; H-FAU 0.00–0.12 g; EtOH 6.5 g; DEP 2.8 g; toluene 20 g; CO<sub>2</sub> 5 MPa (at 393 K); 393 K; 3–15 min. <sup>b</sup>Balance of ethoxy moiety involved in DEC, DEP, and EtOH. <sup>c</sup>Formation rate of DEC, estimated from each slope in Fig. S7.

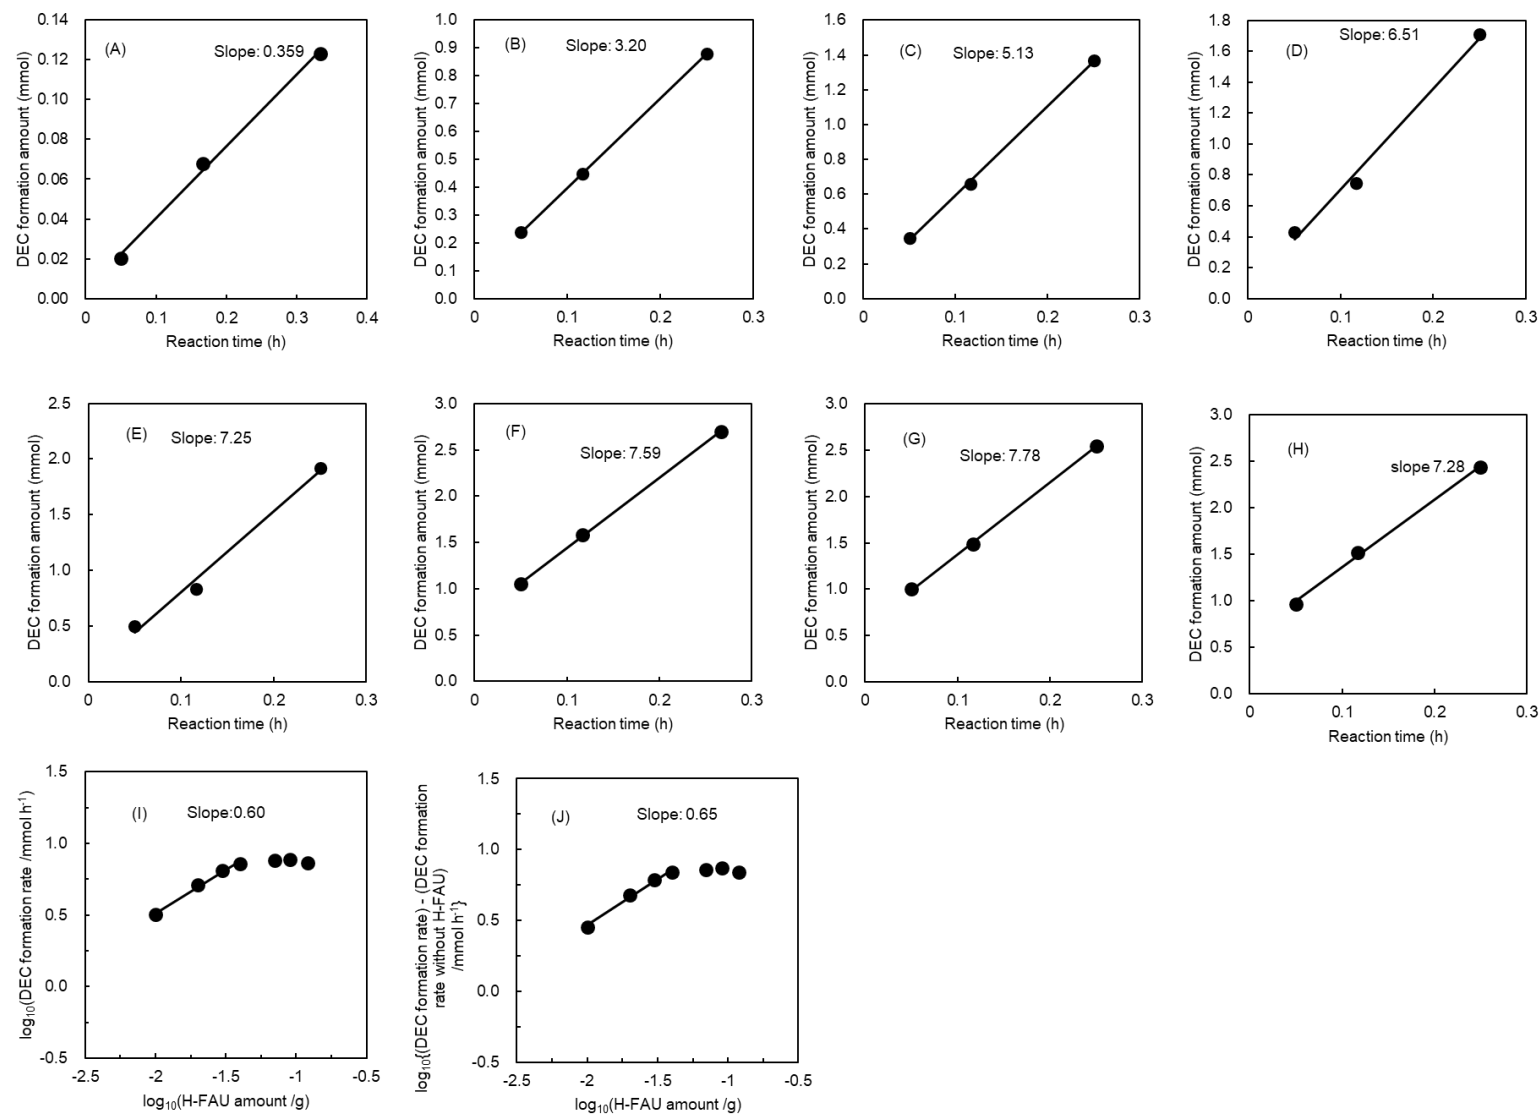

**Figure S7.** Effect of H-FAU amount on time courses for the DEC formation over CeO<sub>2</sub> in the presence of DEP and H-FAU. H-FAU amount =(A) 0 g; (B) 0.01 g; (C) 0.02 g; (D) 0.03 g; (E) 0.04 g; (F) 0.07 g; (G) 0.09 g; (H) 0.12 g. (I) Double logarithmic plot of DEC formation rate as a function of H-FAU amount at constant CeO<sub>2</sub> loading (same figure as Fig. 2B). (J) Double logarithmic plot of (DEC formation rate – DEC formation rate without H-FAU) as a function of H-FAU amount at constant CeO<sub>2</sub> loading. The detailed data are summarized in Table S6.

Reaction conditions: CeO<sub>2</sub> 0.09 g; H-FAU 0.00–0.12 g; EtOH 6.5 g; DEP 2.8 g; toluene 20 g; CO<sub>2</sub> 5 MPa (at 393 K); 393 K; 3–15 min.

**Table S7.** Effect of the amounts of CeO<sub>2</sub> and H-FAU at their constant weight ratio on the DEC synthesis over CeO<sub>2</sub> in the presence of DEP and H-FAU (detailed data for Figs. 2C and S8).<sup>a</sup>

| Entry | CeO <sub>2</sub><br>/g | Time<br>/min | Product /mmol |         | DEC yield<br>/% | Balance /%                 |     | $r_{\text{DEC}}^{\text{c}}$<br>/mmol h <sup>-1</sup> | $\log_{10}(r_{\text{DEC}})$<br>/mmol h <sup>-1</sup> |
|-------|------------------------|--------------|---------------|---------|-----------------|----------------------------|-----|------------------------------------------------------|------------------------------------------------------|
|       |                        |              | DEC           | Acetone |                 | Ethoxy moiety <sup>b</sup> | DEP |                                                      |                                                      |
| 1     | 0.03                   | 3            | 0.13          | 0.68    | 0.60            | 101                        | 106 | 1.1                                                  | 0.058                                                |
| 2     | 0.03                   | 10           | 0.23          | 0.88    | 1.1             | 101                        | 105 |                                                      |                                                      |
| 3     | 0.03                   | 20           | 0.45          | 1.2     | 2.2             | 97                         | 101 |                                                      |                                                      |
| 4     | 0.06                   | 3            | 0.28          | 1.2     | 1.3             | 101                        | 105 | 3.3                                                  | 0.52                                                 |
| 5     | 0.06                   | 7            | 0.42          | 1.4     | 2.0             | 101                        | 103 |                                                      |                                                      |
| 6     | 0.06                   | 15           | 0.93          | 2.0     | 4.5             | 97                         | 100 |                                                      |                                                      |
| 7     | 0.09                   | 3            | 0.43          | 1.6     | 2.0             | 100                        | 103 | 6.5                                                  | 0.81                                                 |
| 8     | 0.09                   | 7            | 0.75          | 1.9     | 3.6             | 96                         | 99  |                                                      |                                                      |
| 9     | 0.09                   | 15           | 1.7           | 3.3     | 8.1             | 100                        | 99  |                                                      |                                                      |

<sup>a</sup>Reaction conditions: CeO<sub>2</sub> 0.03–0.09 g; H-FAU 0.01–0.03 g (CeO<sub>2</sub>/H-FAU weight ratio = 3); EtOH 6.5 g; DEP 2.8 g; toluene 20 g; CO<sub>2</sub> 5 MPa (at 393 K); 393 K; 3–20 min. <sup>b</sup>Balance of ethoxy moiety involved in DEC, DEP, and EtOH.

<sup>c</sup>Formation rate of DEC, estimated from each slope in Fig. S8.

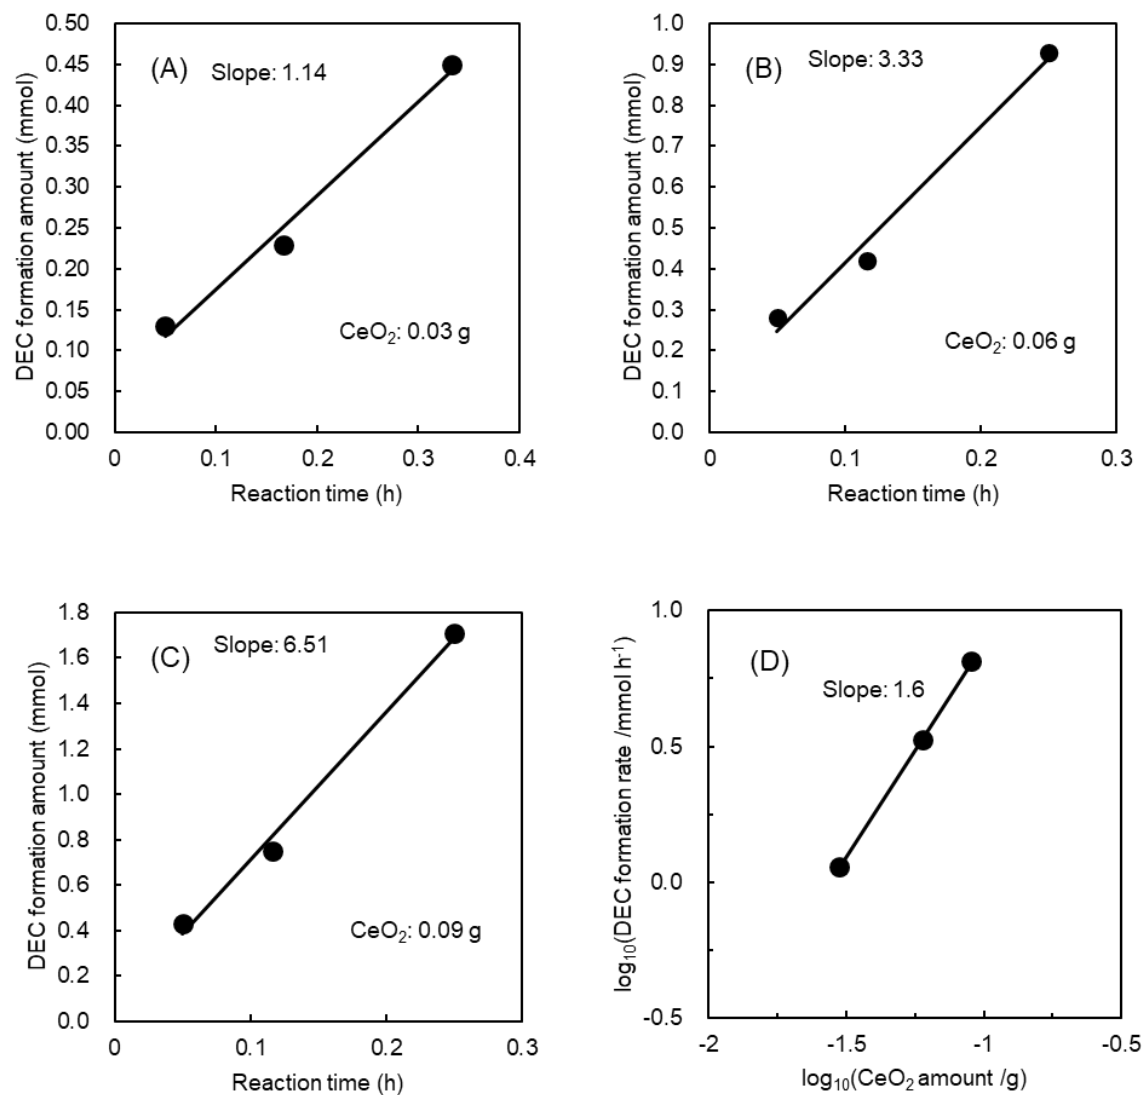

**Figure S8.** Effect of the amounts of CeO<sub>2</sub> and H-FAU at their constant weight ratio on time courses for the DEC formation over CeO<sub>2</sub> in the presence of DEP and H-FAU. CeO<sub>2</sub>/H-FAU amount = (A) 0.03/0.01 g; (B) 0.06/0.02 g; (C) 0.09/0.03 g. (D) Double logarithmic plot of DEC formation rate as a function of CeO<sub>2</sub> amount at constant CeO<sub>2</sub>/H-FAU weight ratio of 3 (same figure as Fig. 2C). The detailed data are summarized in Table S7.

Reaction conditions: CeO<sub>2</sub> 0.03–0.09 g; H-FAU 0.01–0.03 g (CeO<sub>2</sub>/H-FAU weight ratio = 3); EtOH 6.5 g; DEP 2.8 g; toluene 20 g; CO<sub>2</sub> 5 MPa (at 393 K); 393 K; 3–20 min.



**Table S8.** Effect of EtOH amount on the DEC synthesis over CeO<sub>2</sub> in the presence of DEP and H-FAU (detailed data for Figs. 3 (black squares) and S9).<sup>a</sup>

| Entry | EtOH /g | EtOH conc. /mol L <sup>-1</sup> | Time /min | Product /mmol |         | DEC yield /% | Balance /%                 |     |      | $r_{\text{DEC}}^{\text{c}}$ /mmol h <sup>-1</sup> | $\log_{10}(r_{\text{DEC}}^{\text{c}} / \text{mmol h}^{-1})$ |
|-------|---------|---------------------------------|-----------|---------------|---------|--------------|----------------------------|-----|------|---------------------------------------------------|-------------------------------------------------------------|
|       |         |                                 |           | DEC           | Acetone |              | Ethoxy moiety <sup>b</sup> | DEP |      |                                                   |                                                             |
| 1     | 1.6     | 1.2                             | 3         | 0.12          | 1.1     | 0.57         | 99                         | 101 | 0.59 | -0.23                                             |                                                             |
| 2     | 1.6     | 1.2                             | 10        | 0.18          | 1.1     | 0.86         | 100                        | 104 |      |                                                   |                                                             |
| 3     | 1.6     | 1.2                             | 15        | 0.24          | 1.2     | 1.1          | 96                         | 100 |      |                                                   |                                                             |
| 4     | 2.4     | 1.7                             | 3         | 0.16          | 1.2     | 0.76         | 98                         | 101 | 0.79 | -0.15                                             |                                                             |
| 5     | 2.4     | 1.7                             | 10        | 0.23          | 1.2     | 1.1          | 98                         | 102 |      |                                                   |                                                             |
| 6     | 2.4     | 1.7                             | 15        | 0.30          | 1.2     | 1.4          | 100                        | 103 |      |                                                   |                                                             |
| 7     | 3.2     | 2.3                             | 3         | 0.14          | 0.92    | 0.67         | 94                         | 99  | 0.97 | -0.10                                             |                                                             |
| 8     | 3.2     | 2.3                             | 10        | 0.20          | 1.1     | 0.95         | 94                         | 98  |      |                                                   |                                                             |
| 9     | 3.2     | 2.3                             | 20        | 0.36          | 1.3     | 1.7          | 93                         | 96  |      |                                                   |                                                             |
| 10    | 4.0     | 2.7                             | 3         | 0.13          | 0.93    | 0.62         | 93                         | 100 | 1.0  | -0.013                                            |                                                             |
| 11    | 4.0     | 2.7                             | 10        | 0.20          | 1.1     | 0.95         | 92                         | 98  |      |                                                   |                                                             |
| 12    | 4.0     | 2.7                             | 20        | 0.40          | 1.4     | 1.9          | 91                         | 95  |      |                                                   |                                                             |
| 13    | 4.5     | 3.0                             | 3         | 0.13          | 0.92    | 0.62         | 93                         | 100 | 1.0  | 0.010                                             |                                                             |
| 14    | 4.5     | 3.0                             | 10        | 0.25          | 1.1     | 1.2          | 93                         | 98  |      |                                                   |                                                             |
| 15    | 4.5     | 3.0                             | 20        | 0.42          | 1.3     | 2.0          | 93                         | 98  |      |                                                   |                                                             |
| 16    | 5.0     | 3.3                             | 3         | 0.14          | 0.97    | 0.67         | 93                         | 100 | 1.1  | 0.025                                             |                                                             |
| 17    | 5.0     | 3.3                             | 10        | 0.26          | 1.0     | 1.2          | 93                         | 98  |      |                                                   |                                                             |
| 18    | 5.0     | 3.3                             | 20        | 0.44          | 1.4     | 2.1          | 92                         | 97  |      |                                                   |                                                             |
| 19    | 6.5     | 4.0                             | 3         | 0.13          | 0.68    | 0.62         | 101                        | 106 | 1.1  | 0.058                                             |                                                             |
| 20    | 6.5     | 4.0                             | 10        | 0.23          | 0.88    | 1.1          | 101                        | 105 |      |                                                   |                                                             |
| 21    | 6.5     | 4.0                             | 20        | 0.45          | 1.2     | 2.1          | 97                         | 101 |      |                                                   |                                                             |

<sup>a</sup>Reaction conditions: CeO<sub>2</sub> 0.03 g; H-FAU 0.01 g; EtOH 1.6–6.5 g; DEP 2.8 g; toluene 20 g; CO<sub>2</sub> 5 MPa (at 393 K); 393 K; 3–20 min.

<sup>b</sup>Balance of ethoxy moiety involved in DEC, DEP, and EtOH. <sup>c</sup>Formation rate of DEC, estimated from each slope in Fig. S9.

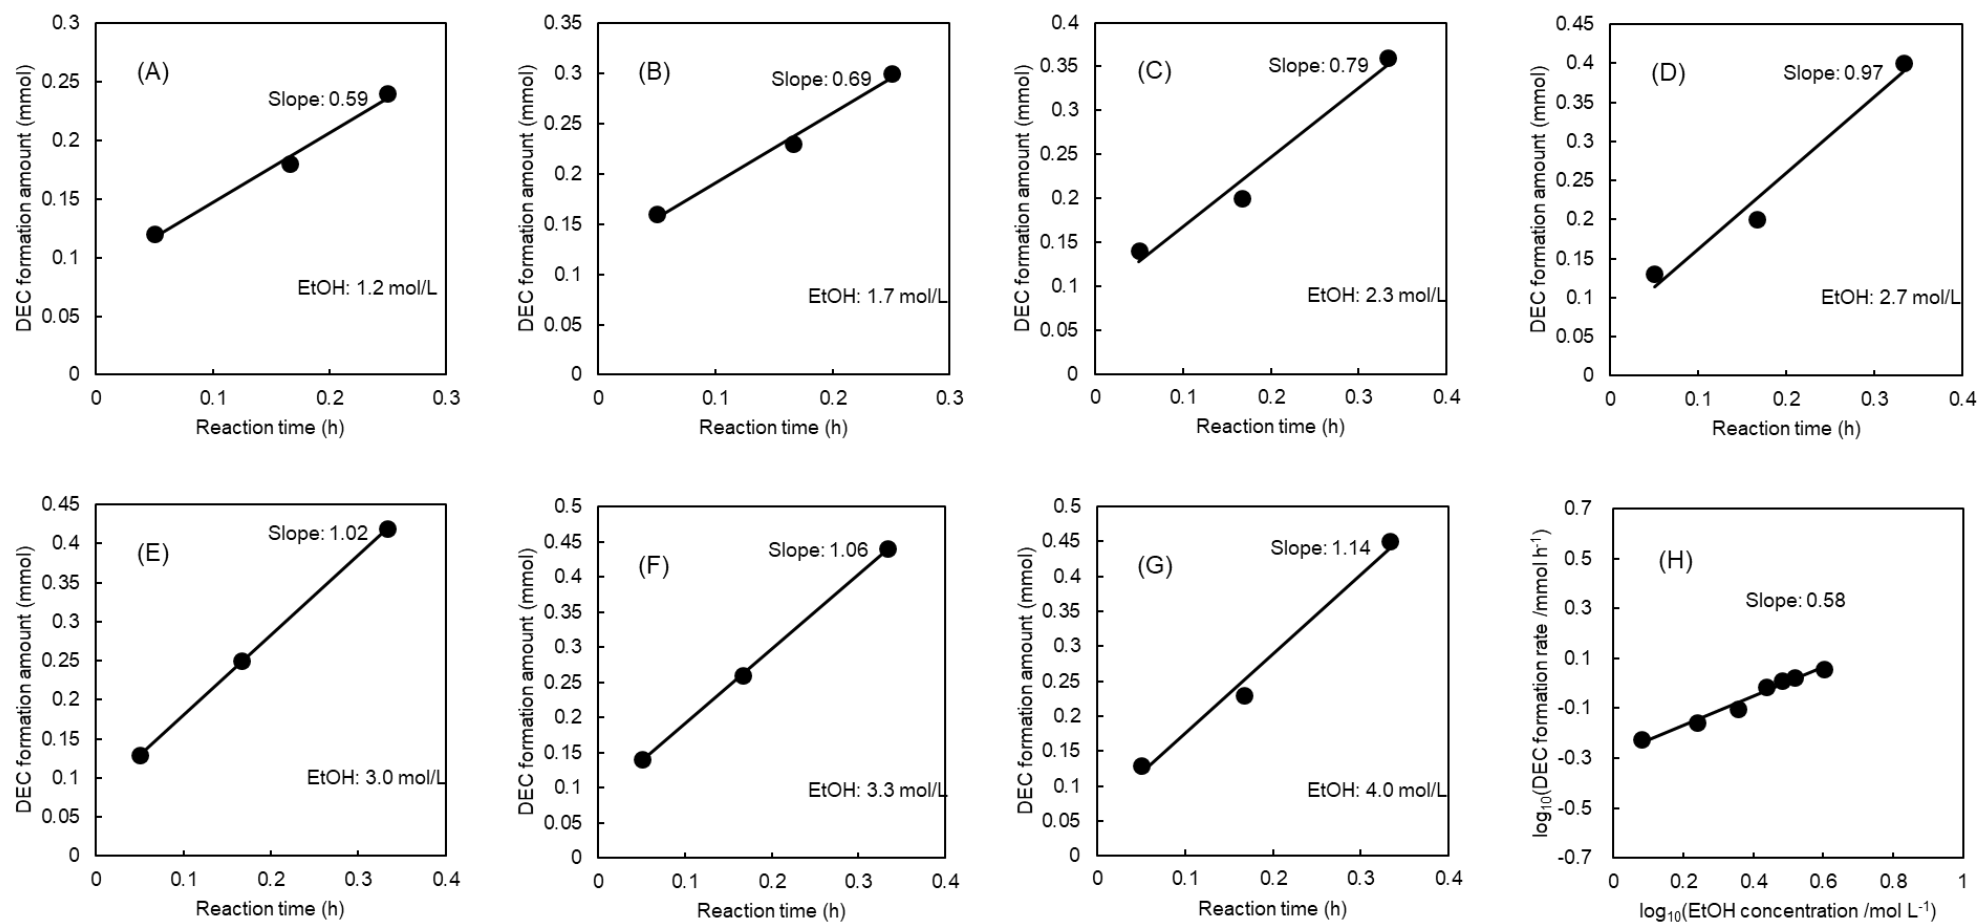

**Figure S9.** Effect of EtOH amount on time courses for the DEC formation over CeO<sub>2</sub> in the presence of DEP and H-FAU. EtOH amount = (A) 1.6 g (1.3 M); (B) 2.4 g (2.0 M); (C) 3.2 g (2.7 M); (D) 4.0 g (3.3 M); (E) 4.5 g (3.7 M); (F) 5.0 g (4.2 M); (G) 6.5 g (5.4 M). (H) Double logarithmic plot of DEC formation rate as a function of EtOH concentration (same figure as Fig. 3 (black squares)). The detailed data are summarized in Table S8.

Reaction conditions: CeO<sub>2</sub> 0.03 g; H-FAU 0.01 g; EtOH 1.6–6.5 g; DEP 2.8 g; toluene 20 g; CO<sub>2</sub> 5 MPa (at 393 K); 393 K; 3–20 min.

**Table S9.** Effect of EtOH amount on the DEC synthesis over CeO<sub>2</sub> without DEP or H-FAU (detailed data for Figs. 3 (red circles) and S10).<sup>a</sup>

| Entry | EtOH /g | Toluene /g | EtOH conc. /mol L <sup>-1</sup> | Time /min | Product /mmol | DEC yield /% | Balance /%                 | $r_{\text{DEC}}^{\text{c}}$ /mmol h <sup>-1</sup> | $\log_{10}(r_{\text{DEC}})$ /mmol h <sup>-1</sup> |
|-------|---------|------------|---------------------------------|-----------|---------------|--------------|----------------------------|---------------------------------------------------|---------------------------------------------------|
|       |         |            |                                 |           | DEC           |              | Ethoxy moiety <sup>b</sup> |                                                   |                                                   |
| 1     | 3.2     | 20         | 2.5                             | 3         | 0.0066        | <1           | 87                         | 0.076                                             | -1.1                                              |
| 2     | 3.2     | 20         | 2.5                             | 10        | 0.012         | <1           | 84                         |                                                   |                                                   |
| 3     | 3.2     | 20         | 2.5                             | 20        | 0.028         | <1           | 92                         |                                                   |                                                   |
| 4     | 1.6     | 8.2        | 2.9                             | 3         | 0.0071        | <1           | 95                         | 0.095                                             | -1.0                                              |
| 5     | 1.6     | 8.2        | 2.9                             | 5         | 0.010         | <1           | 95                         |                                                   |                                                   |
| 6     | 1.6     | 8.2        | 2.9                             | 10        | 0.018         | <1           | 93                         |                                                   |                                                   |
| 7     | 4.8     | 20         | 3.5                             | 3         | 0.0080        | <1           | 93                         | 0.066                                             | -1.2                                              |
| 8     | 4.8     | 20         | 3.5                             | 7         | 0.011         | <1           | 93                         |                                                   |                                                   |
| 9     | 4.8     | 20         | 3.5                             | 15        | 0.021         | <1           | 90                         |                                                   |                                                   |
| 10    | 6.5     | 20         | 4.4                             | 3         | 0.0078        | <1           | 96                         | 0.072                                             | -1.1                                              |
| 11    | 6.5     | 20         | 4.4                             | 7         | 0.011         | <1           | 92                         |                                                   |                                                   |
| 12    | 6.5     | 20         | 4.4                             | 15        | 0.022         | <1           | 95                         |                                                   |                                                   |
| 13    | 3.2     | 6.3        | 5.6                             | 3         | 0.012         | <1           | 89                         | 0.066                                             | -1.2                                              |
| 14    | 3.2     | 6.3        | 5.6                             | 10        | 0.022         | <1           | 91                         |                                                   |                                                   |
| 15    | 3.2     | 6.3        | 5.6                             | 20        | 0.031         | <1           | 90                         |                                                   |                                                   |
| 16    | 6.5     | 2.9        | 11                              | 3         | 0.019         | <1           | 95                         | 0.062                                             | -1.2                                              |
| 17    | 6.5     | 2.9        | 11                              | 7         | 0.021         | <1           | 94                         |                                                   |                                                   |
| 18    | 6.5     | 2.9        | 11                              | 15        | 0.031         | <1           | 95                         |                                                   |                                                   |
| 19    | 6.5     | 0          | 17                              | 3         | 0.016         | <1           | 92                         | 0.081                                             | -1.1                                              |
| 20    | 6.5     | 0          | 17                              | 10        | 0.025         | <1           | 92                         |                                                   |                                                   |
| 21    | 6.5     | 0          | 17                              | 20        | 0.039         | <1           | 92                         |                                                   |                                                   |

<sup>a</sup>Reaction conditions: CeO<sub>2</sub> 0.03 g; EtOH 1.6–6.5 g; toluene 0–20 g; CO<sub>2</sub> 5 MPa (at 393 K); 393 K; 3–20 min. <sup>b</sup>Balance of ethoxy moiety involved in DEC and EtOH. <sup>c</sup>Formation rate of DEC, estimated from each slope in Fig. S10.

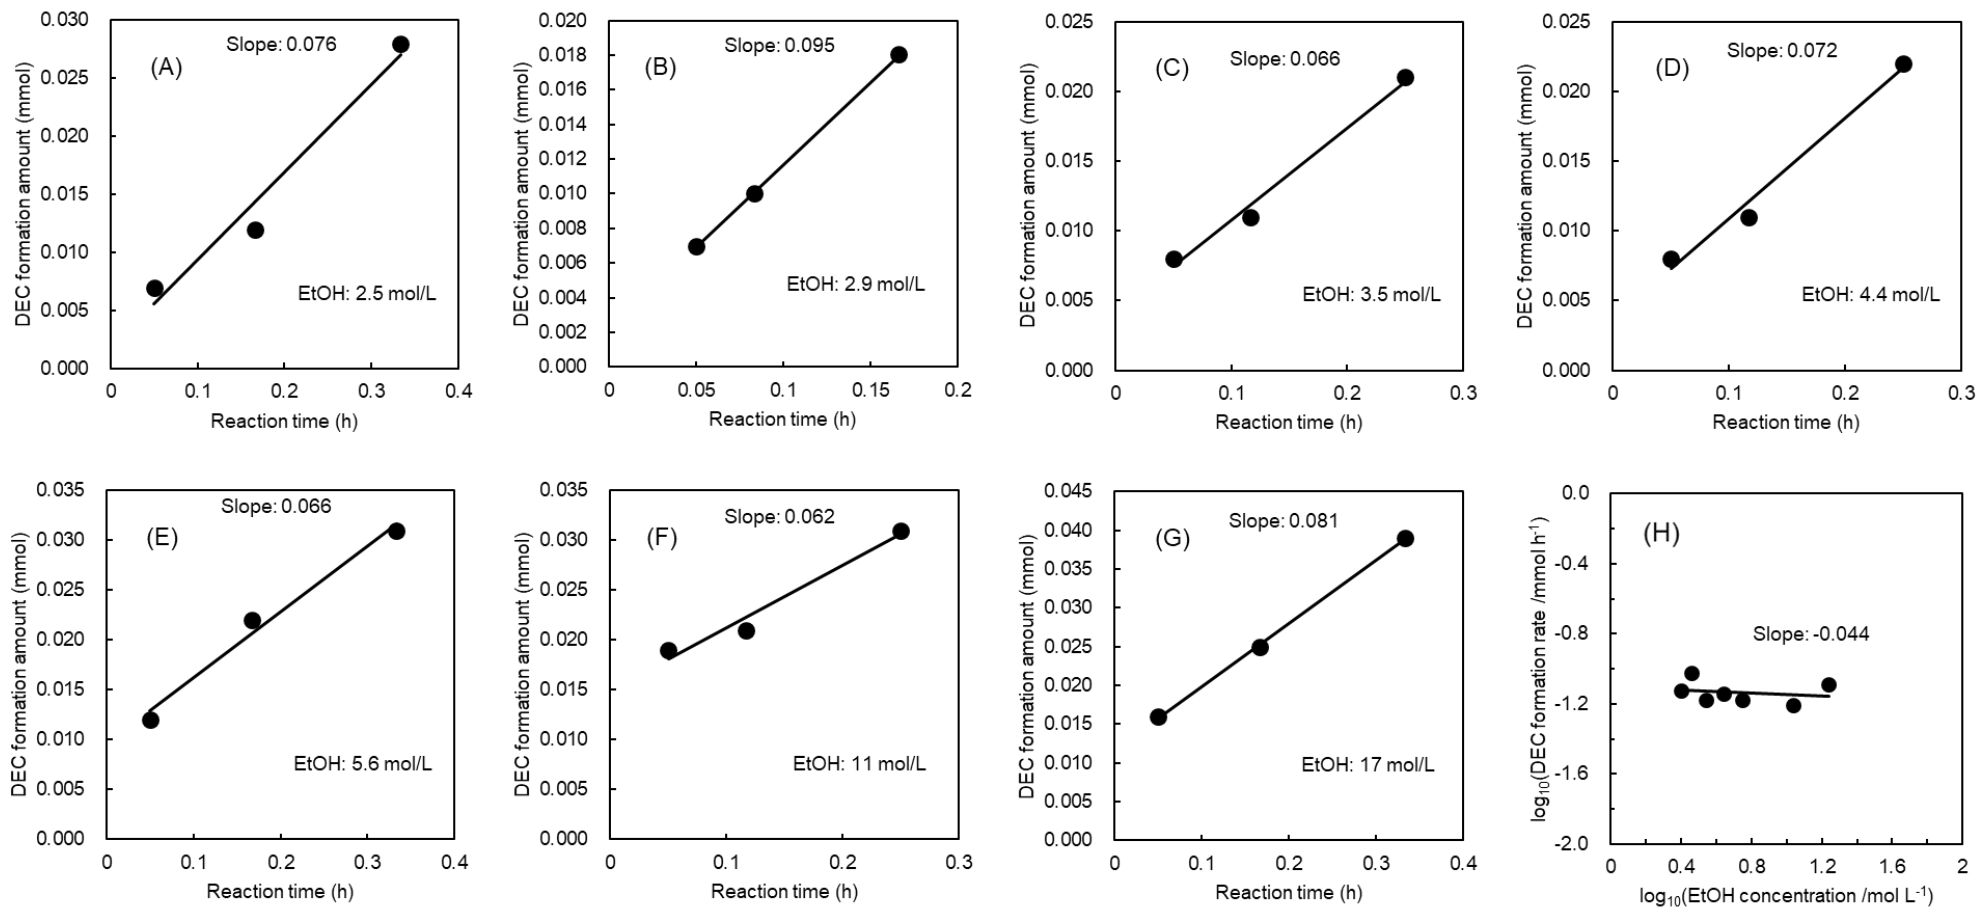

**Figure S10.** Effect of EtOH amount on time courses for the DEC formation over CeO<sub>2</sub>. EtOH/toluene amount (EtOH concentration) = (A) 3.2 g/20 g (2.5 M); (B) 1.6 g/8.2 g (2.9 M); (C) 4.8 g/20 g (3.5 M); (D) 6.5 g/20 g (4.4 M); (E) 3.2 g/6.3 g (5.6 M); (F) 6.5 g/2.9 g (11 M); (G) 6.5 g/0 g (17 M). (H) Double logarithmic plot of DEC formation rate as a function of EtOH concentration (same figure as Figure 3 (red squares)). The detailed data are summarized in Table S9. Reaction conditions: CeO<sub>2</sub> 0.03 g; EtOH 1.6–6.5 g; toluene 0–20 g; CO<sub>2</sub> 5 MPa (at 393 K); 393 K; 3–20 min.

**Table S10.** Effect of DEP amount on the DEC synthesis over CeO<sub>2</sub> in the presence of DEP and H-FAU (detailed data for Figs. 4 and S11).<sup>a</sup>

| Entry | DEP /mmol | DEP conc. /mol L <sup>-1</sup> | Time /min | Product /mmol |         | DEC yield /% | Balance /%                 |     | $r_{\text{DEC}}^{\text{c}}$ /mmol h <sup>-1</sup> | log <sub>10</sub> ( $r_{\text{DEC}}$ /mmol h <sup>-1</sup> ) |
|-------|-----------|--------------------------------|-----------|---------------|---------|--------------|----------------------------|-----|---------------------------------------------------|--------------------------------------------------------------|
|       |           |                                |           | DEC           | Acetone |              | Ethoxy moiety <sup>b</sup> | DEP |                                                   |                                                              |
| 1     | 7.0       | 0.21                           | 3         | 0.13          | 1.2     | 1.9          | 96                         | 103 | 1.1                                               | 0.032                                                        |
| 2     | 7.0       | 0.21                           | 10        | 0.21          | 1.1     | 3.0          | 96                         | 97  |                                                   |                                                              |
| 3     | 7.0       | 0.21                           | 20        | 0.43          | 1.4     | 6.1          | 94                         | 94  |                                                   |                                                              |
| 4     | 14        | 0.41                           | 3         | 0.13          | 0.85    | 0.92         | 95                         | 97  | 1.2                                               | 0.061                                                        |
| 5     | 14        | 0.41                           | 10        | 0.21          | 0.99    | 1.5          | 94                         | 97  |                                                   |                                                              |
| 6     | 14        | 0.41                           | 20        | 0.45          | 1.3     | 3.2          | 95                         | 95  |                                                   |                                                              |
| 7     | 21        | 0.60                           | 3         | 0.13          | 0.68    | 0.62         | 101                        | 106 | 1.1                                               | 0.058                                                        |
| 8     | 21        | 0.60                           | 10        | 0.23          | 0.88    | 1.1          | 101                        | 105 |                                                   |                                                              |
| 9     | 21        | 0.60                           | 20        | 0.45          | 1.2     | 2.1          | 97                         | 101 |                                                   |                                                              |
| 10    | 28        | 0.77                           | 3         | 0.13          | 1.1     | 0.46         | 95                         | 99  | 1.2                                               | 0.083                                                        |
| 11    | 28        | 0.77                           | 7         | 0.20          | 1.6     | 0.71         | 95                         | 100 |                                                   |                                                              |
| 12    | 28        | 0.77                           | 15        | 0.37          | 1.7     | 1.3          | 96                         | 99  |                                                   |                                                              |

<sup>a</sup>Reaction conditions: CeO<sub>2</sub> 0.03 g; H-FAU 0.01 g; EtOH 6.5 g; DEP 7.0–28 mmol; toluene 20 g; CO<sub>2</sub> 5 MPa (at 393 K); 393 K; 3–15 min.

<sup>b</sup>Balance of ethoxy moiety involved in DEC, DEP, and EtOH. <sup>c</sup>Formation rate of DEC, estimated from each slope in Fig. S11.

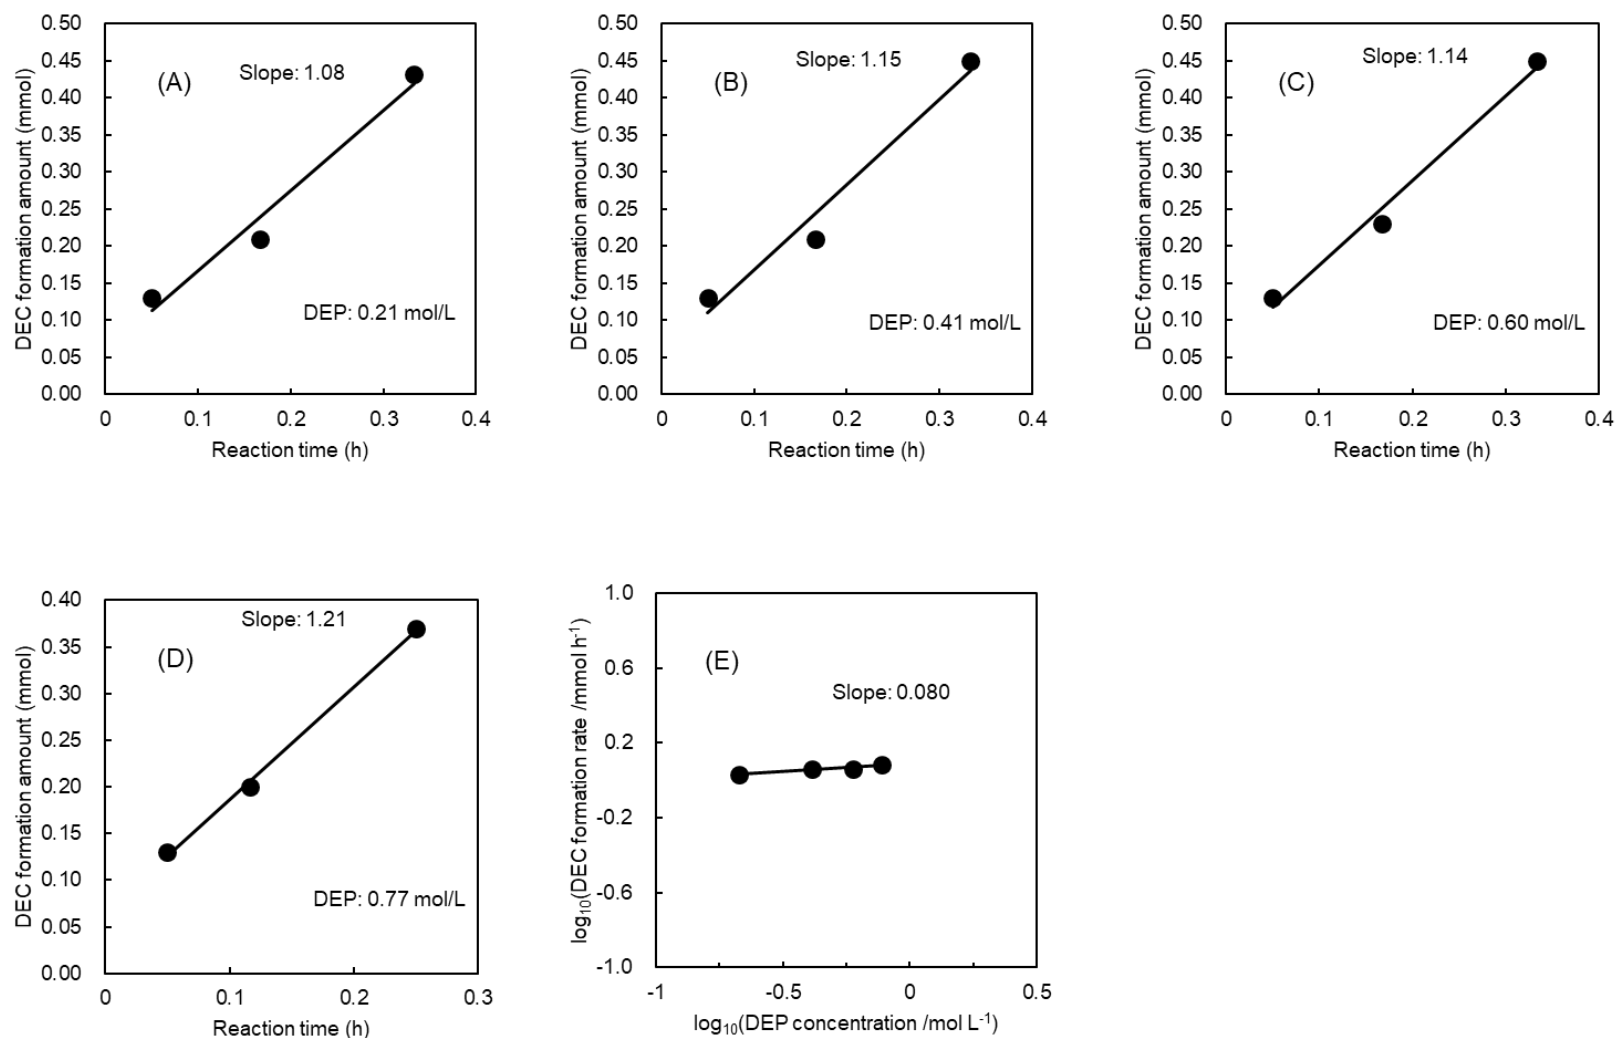

**Figure S11.** Effect of DEP amount on time courses for the DEC formation over  $\text{CeO}_2$  in the presence of DEP and H-FAU. DEP amount = (A) 7 mmol (0.21 M); (B) 14 mmol (0.41 M); (C) 21 mmol (0.60 M); (D) 28 mmol (0.77 M). (E) Double logarithmic plot of DEC formation rate as a function of DEP concentration (same figure as Fig. 4). The detailed data are summarized in Table S10.

Reaction conditions:  $\text{CeO}_2$  0.03 g; H-FAU 0.01 g; EtOH 6.5 g; DEP 7–28 mmol; toluene 20 g;  $\text{CO}_2$  5 MPa (at 393 K); 393 K; 3–15 min.

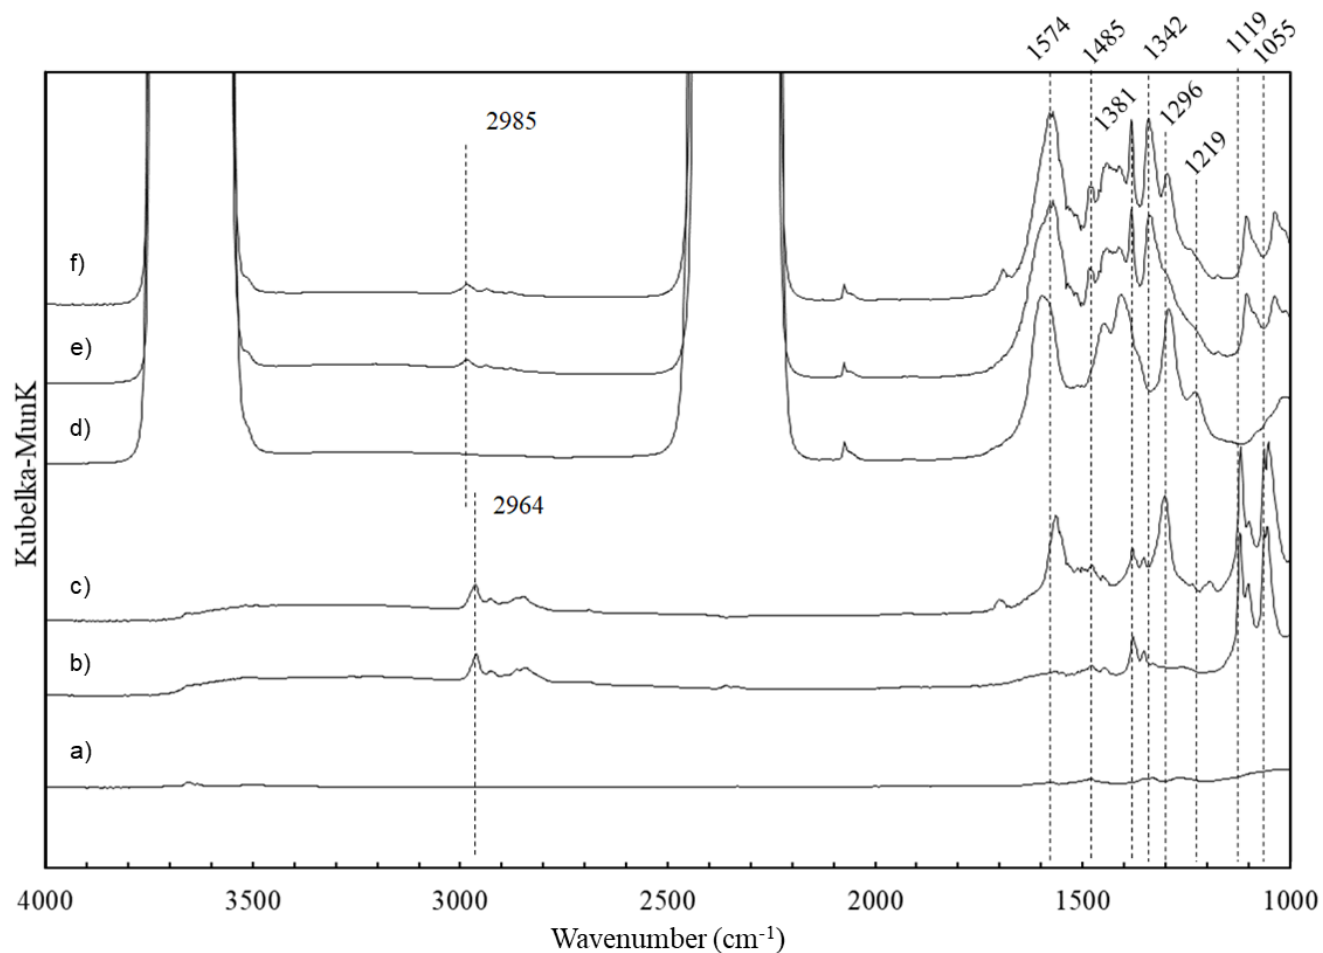

**Figure S12.** Full-scale DRIFT spectra of CeO<sub>2</sub> with different treatment(s): (a) after treatment at 873 K for 3 h in 20 vol% O<sub>2</sub>/N<sub>2</sub> flow (50 mL min<sup>-1</sup>); (b) after injection of EtOH in N<sub>2</sub> flow (30 mL min<sup>-1</sup>) at 0.1 MPa; (c) after injection of DEP in N<sub>2</sub> flow (30 mL min<sup>-1</sup>) at 0.1 MPa; (d) after pressurization by CO<sub>2</sub> at 4 MPa; (e) after injection of EtOH in N<sub>2</sub> flow (30 mL min<sup>-1</sup>) at 0.1 MPa, purging with CO<sub>2</sub>, and pressurization by CO<sub>2</sub> at 4 MPa; (f) after injection of DEP in N<sub>2</sub> flow (30 mL min<sup>-1</sup>) at 0.1 MPa, purging with CO<sub>2</sub>, and pressurization by CO<sub>2</sub> at 4 MPa. The whole procedure except for (a) was operated at room temperature. The spectra (a–c) were recorded in N<sub>2</sub> flow (30 mL min<sup>-1</sup>) at room temperature, and the spectra (d–f) were done in CO<sub>2</sub> (4 MPa) at room temperature. All the spectra were recorded after the CeO<sub>2</sub> surface was saturated by each compound (*i.e.*, EtOH, DEP, or CO<sub>2</sub>). All the spectra were normalized on the basis of the spectrum of CeO<sub>2</sub> itself before each treatment.

The expanded spectra are shown in Fig. 5. The detailed assignments are listed in Table S11.

**Table S11.** Assignment of absorption peaks observed in DRIFT spectra of CeO<sub>2</sub> with different treatments (Fig. 5).

| Wavenumber /cm <sup>-1</sup> | Assignment                                                           | Similar band in other works <sup>a</sup>                                                                 | Ref(s) |
|------------------------------|----------------------------------------------------------------------|----------------------------------------------------------------------------------------------------------|--------|
| 2985                         | $\nu_{\text{as}}(\text{CH}_3)$ of ethyl moiety in ethyl carbonate    |                                                                                                          |        |
| 2964                         | $\nu_{\text{as}}(\text{CH}_3)$ of ethyl moiety in ethoxy species     | $\nu_{\text{as}}(\text{CH}_3)$ of ethyl moiety (2970)                                                    | S2, S3 |
| 2929                         | $\nu_{\text{as}}(\text{CH}_2)$ of ethyl moiety                       | $\nu_{\text{as}}(\text{CH}_2)$ of ethyl moiety (2933–2930)                                               | S2, S3 |
| 2845                         | $\nu_{\text{s}}(\text{CH}_3)$ of ethyl moiety                        | $\nu_{\text{s}}(\text{CH}_3)$ of ethyl moiety (2880)                                                     | S2     |
| 1598                         | $\nu(\text{CO}_3)$ of hydrogen carbonate                             | $\nu(\text{CO}_3)$ of hydrogen carbonate (1613, 1599)                                                    | S4     |
| 1583                         | $\nu(\text{CO}_3)$ of hydrogen carbonate                             | $\nu(\text{CO}_3)$ of hydrogen carbonate (1599)                                                          | S4     |
| 1574                         | $\nu(\text{CO}_3)$ of bidentate ethyl carbonate                      | $\nu(\text{CO}_3)$ of bidentate carbonate (1567)                                                         | S4     |
| 1485                         | $\nu(\text{CO}_3)$ of monodentate ethyl carbonate                    | $\nu(\text{CO}_3)$ of monodentate carbonate (1504)                                                       | S4     |
| 1479                         | $\delta(\text{CH}_2)$ of ethyl moiety                                | $\delta(\text{CH}_2)$ of ethyl moiety (1473)                                                             | S3     |
| 1461                         | $\nu(\text{CO}_3)$ of polydentate ethyl carbonate                    | $\nu(\text{CO}_3)$ of polydentate carbonate (1462–1460)                                                  | S4, S5 |
| 1413                         | $\nu(\text{CO}_3)$ of hydrogen carbonate                             | $\nu(\text{CO}_3)$ of hydrogen carbonate (1413–1404)                                                     | S4, S6 |
| 1381                         | $\nu(\text{CO}_3)$ of polydentate and/or monodentate ethyl carbonate | $\nu(\text{CO}_3)$ of polydentate carbonate (1353)<br>$\nu(\text{CO}_3)$ of monodentate carbonate (1351) | S4     |
| 1380                         | $\delta_{\text{s}}(\text{CH}_3)$ of ethoxy species                   | $\delta_{\text{s}}(\text{CH}_3)$ of ethoxy species                                                       | S3     |
| 1342                         | $\nu(\text{CO}_3)$ of monodentate ethyl carbonate                    | $\nu(\text{CO}_3)$ of monodentate ethyl carbonate (1351)                                                 | S4     |
| 1296                         | $\nu(\text{CO}_3)$ of bidentate ethyl carbonate                      | $\nu(\text{CO}_3)$ of bidentate carbonate (1289–1278)                                                    | S4, S5 |
| 1219                         | $\delta(\text{OH})$ of hydrogen ethyl carbonate                      | $\delta(\text{OH})$ of hydrogen carbonate (1218–1217)                                                    | S4, S6 |
| 1122                         | $\nu(\text{C}-\text{O})$ of terminal ethoxy species                  | $\nu(\text{C}-\text{O})$ of terminal alkoxy species (1110–1101)                                          | S2, S5 |
| 1054                         | $\nu(\text{C}-\text{O})$ of bridged ethoxy species                   | $\nu(\text{C}-\text{O})$ of bridged alkoxy species (1050)                                                | S5     |
| 1037                         | $\nu(\text{CO}_3)$ of hydrogen carbonate                             | $\nu(\text{CO}_3)$ of hydrogen carbonate (1025)                                                          | S4     |

<sup>a</sup>Values in parentheses represent wavenumber (unit: cm<sup>-1</sup>).



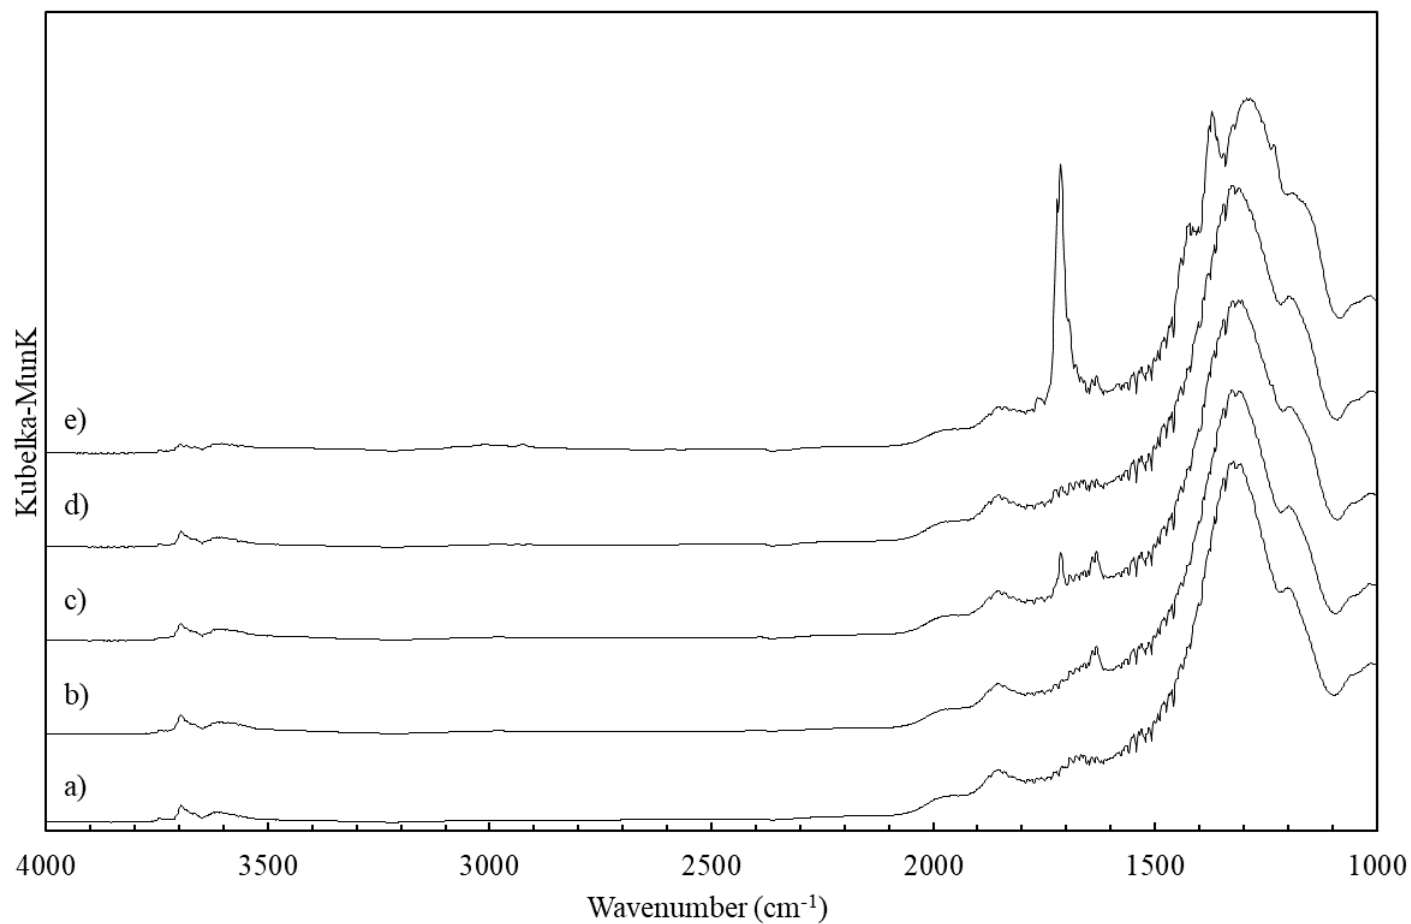

**Fig. S13.** DRIFT spectra of H-FAU after heat-treatment at 773 K for 1 h in 20 vol% O<sub>2</sub>/N<sub>2</sub> (50 mL min<sup>-1</sup>) and subsequent different treatment(s): (a) in N<sub>2</sub> flow (30 mL min<sup>-1</sup>); (b) after injection of 1.1 μmol of EtOH in N<sub>2</sub> flow (30 mL min<sup>-1</sup>) at 0.1 MPa; (c) after injection of 1.1 μmol of DEP in N<sub>2</sub> flow (30 mL min<sup>-1</sup>) at 0.1 MPa; (d) after injection of 0.55 μmol of DEC in N<sub>2</sub> flow (30 mL min<sup>-1</sup>) at 0.1 MPa; (e) after injection of 3.2 μmol of acetone in N<sub>2</sub> flow (30 mL min<sup>-1</sup>) at 0.1 MPa. The whole treatment procedure was operated at room temperature. All the spectra were recorded in N<sub>2</sub> flow (30 mL min<sup>-1</sup>) at room temperature and normalized on the basis of the spectrum of H-FAU itself before each treatment.

**Table S12.** Effect of DEP amount on the DEC synthesis over CeO<sub>2</sub> in the presence of DEP and H-FAU (detailed data for Fig. 6).<sup>a</sup>

| Entry | EtOH used /mmol | EtOH detected /mmol | Product /mmol |         | Balance /%                    |     |
|-------|-----------------|---------------------|---------------|---------|-------------------------------|-----|
|       |                 |                     | DEC           | Acetone | Ethoxy moiety (in DEP + EtOH) | DEP |
| 1     | 0               | 6                   | 0.26          | 1.2     | 89                            | 96  |
| 2     | 18              | 18                  | 1.2           | 2.1     | 84                            | 91  |
| 3     | 35              | 33                  | 2.3           | 3.9     | 88                            | 97  |
| 4     | 52              | 52                  | 2.9           | 5.8     | 94                            | 107 |
| 5     | 70              | 68                  | 4.1           | 5.7     | 93                            | 101 |
| 6     | 105             | 103                 | 4.3           | 5.9     | 97                            | 108 |

<sup>a</sup>Reaction conditions: CeO<sub>2</sub> 0.1 g; H-FAU 0.01 g; EtOH 0–105 mmol; DEP 21 mmol; toluene 20 g; CO<sub>2</sub> 5 MPa (at room temperature); 393 K; 1 h.

#### Supplementary references

- S1. T. Chang, M. Tamura, Y. Nakagawa, N. Fukaya, J.-C. Choi, T. Mishima, S. Matsumoto, S. Hamura and K. Tomishige, *Green Chem.* 2020, **22**, 7321–7327.
- S2. W. Xu, Z. Liu, A. C. Johnston-Peck, S. D. Senanayake, G. Zhou, D. Stacchiola, E. A. Stach and J. A. Rodriguez, *ACS Catal.* 2013, **3**, 975–984.
- S3. A. Yee, S. J. Morrison and H. Idriss, *J. Catal.* 1999, **186**, 279–295.
- S4. C. Binet, M. Daturi and J.-C. Lavalley, *Catal. Today* 1999, **50**, 207–225.
- S5. Y. Yoshida, Y. Arai, S. Kado, K. Kunimori and K. Tomishige, *Catal. Today* 2006, **115**, 95–101.
- S6. K. Yoshikawa, H. Sato, M. Kaneeda and J. N. Kondo, *J. CO<sub>2</sub> Util.* 2014, **8**, 34–38.
